# Supplementary material for: New Insights into Vaginal Environment During Pregnancy
Source: Front Mol Biosci. 2021 May 17;8:656844. doi: 10.3389/fmolb.2021.656844 (PMC8165225; doi:10.3389/fmolb.2021.656844)
Supplement: Supplementary file 2 [file DataSheet1.XLSX]

## Sheet: normal pregnancy
	Formate-8.4415	Hypoxanthine-8.1958	Adenine-8.1866	Xanthine-7.9365	Hippurate-7.8238	Tryptophan-7.7316	Benzoate-7.4743	Phenylalanine-7.3800	Phenylpropionate-7.3198	Tyramine-7.2123	4-Hydroxyphenylacetate-7.1889	4-Hydroxyphenyllactate-6.8472	Fumarate-6.5076	Inosine-6.0888	UDP-5.9707	Uridine-5.8975	Uracil-5.7928	Maltose-5.2280	Ascorbate-4.5071	1,3-Dihydroxyacetone-4.4107	Hydroxyacetone-4.3669	Threonine-4.2471	Lactate-4.1046	Serine-3.9705	Glycine-3.5534	Glucose-3.5209	Methanol-3.3488	Taurine-3.2444	sn-Glycero-3-phosphocholine-3.2158	O-Acetylcholine-3.2060	Choline-3.1912	Ethanolamine-3.1345	Malonate-3.1196	Creatinine-3.0356	Creatine-3.0242	Cadaverine-2.9977	Asparagine-2.8804	TMA-2.8716	Aspartate-2.7846	Sarcosine-2.7442	DMA-2.7072	Methylamine-2.5927	Glutamine-2.4435	Succinate-2.3936	Pyruvate-2.3620	Glutamate-2.3382	4-Aminobutyrate-2.2977	5-Aminopentanoate-2.2332	Methionine-2.1257
A001	0.141476	0.00272927	0.00592285	0.0168967	0.00674399	0.00347047	0.00478354	0.00779495	0.00794529	0.0468057	0.0371532	0.00493591	0.00232658	0.00772846	0.0212077	0.00883535	0.00916038	0.102874	0.00368575	0.00177916	0.00290103	0.0536364	2.88898	0.0527936	0.0631235	0.0533271	0.0145816	0.186433	0.00243904	0.000879451	0.0125174	0.0355768	0.0212484	0.038861	0.0358199	0.0558281	0.0363459	0.0265253	0.0318854	0.00809507	0.00197927	0.0185013	0.0485515	1.06023	0.146164	0.447669	0.0234073	0.0854723	0.0130134
A002	0.0266185	0.00468915	0.0119924	0.00367036	0.00708156	0.0133421	0.00617342	0.05314	0.0639371	0.0039112	0.0428221	0.00482558	0.00125227	0.00508026	0.0177206	0.0148859	0.00818977	0.0328846	0.00282939	0.00153722	0.002118	0.0830029	2.49864	0.103805	0.102066	0.0268618	0.00795577	0.068514	0.00964186	0.00165212	0.00447362	0.0228233	0.0031604	0.0272573	0.0271423	0.00778754	0.0147235	0.000339654	0.0544774	0.0246624	0.00124029	0.00170121	0.024125	0.0198207	0.0935845	0.504894	0.0244698	0.0139131	0.00982973
A003	0.0183645	0.00269343	0.0185323	0.00402524	0.0058022	0.0130466	0.00364317	0.0468398	0.0612907	0.00224752	0.0354167	0.00812284	0.00106144	0.00317247	0.0110336	0.0100587	0.00683394	0.134288	0.00453788	0.000820492	0.0016686	0.0671196	2.30477	0.0755304	0.0671086	0.0443903	0.00944589	0.108843	0.0112666	0.00170267	0.00506929	0.0212654	0.00128408	0.0359147	0.0196236	0.0103168	0.0199976	0.000313916	0.0298879	0.0196578	0.0015199	0.000991313	0.0242789	0.0231952	0.0155713	0.361413	0.0203032	0.017565	0.0106414
A004	0.0277977	0.00358957	0.0231023	0.00584245	0.00845037	0.00854186	0.00411977	0.0326949	0.0441864	0.00997744	0.020202	0.00542558	0.000813823	0.00452579	0.0196094	0.024467	0.00676795	0.212818	0.00904943	0.00217962	0.00169588	0.0610577	1.7906	0.0547366	0.072845	0.0597544	0.011094	0.074829	0.0107487	0.000452883	0.00863328	0.0219705	0.00137527	0.00656068	0.0280071	0.0122829	0.0171087	0.000253749	0.0296992	0.00396508	0.000482121	0.00162224	0.0647909	0.0165827	0.00858565	0.21776	0.0260469	0.0197243	0.022239
A005	0.0265979	0.00484288	0.0201614	0.00489733	0.00502923	0.0106687	0.0030974	0.0200595	0.0327562	0.00375221	0.017136	0.00496641	0.00169282	0.00399992	0.0144632	0.00921699	0.00873257	0.210393	0.00740601	0.000808629	0.0027264	0.0427304	3.91633	0.0931035	0.0673868	0.0358911	0.0100095	0.137579	0.0124348	0.00112246	0.00516433	0.0165744	0.00111662	0.0184294	0.0316835	0.0069972	0.0140554	0.000354168	0.020795	0.00452197	0.000822273	0.00128034	0.0269693	0.0137711	0.0200907	0.319029	0.010119	0.0212989	0.0124178
A006	0.0325553	0.0024503	0.0155269	0.00518214	0.00851029	0.0116481	0.0034579	0.0291996	0.0357416	0.00337528	0.0215086	0.00637052	0.00183966	0.0101038	0.0157081	0.0130118	0.0119846	0.247441	0.00380229	0.00271577	0.00226922	0.0445218	1.24798	0.067555	0.0288344	0.120729	0.013246	0.108223	0.00974953	0.000496649	0.00394452	0.0158162	0.00110358	0.0118478	0.0226195	0.00518931	0.0113256	0.00024885	0.0162822	0.00670814	0.000751174	0.00167742	0.0314114	0.0725598	0.0153639	0.164212	0.00664299	0.012722	0.00897985
A007	0.0250608	0.00249271	0.0109581	0.00410735	0.00527106	0.0103981	0.0032793	0.0174125	0.0303499	0.00229112	0.019249	0.0102623	0.0012075	0.0070582	0.0118735	0.0103329	0.00614337	0.210321	0.00223952	0.00334993	0.00199964	0.0572801	2.21216	0.088224	0.051281	0.0749181	0.0120781	0.0751064	0.0125015	0.00048615	0.0152721	0.0175856	0.00117382	0.0106184	0.0221017	0.00624213	0.0106459	0.00028353	0.0187229	0.0053232	0.000569152	0.00127175	0.035932	0.0321516	0.0182752	0.231432	0.00831069	0.0127487	0.0125156
A010	0.0133973	0.00526205	0.00673508	0.00246009	0.00403277	0.0100743	0.00215007	0.0364658	0.0487938	0.0017788	0.0342797	0.00520618	0.000668917	0.00276639	0.0116489	0.00413345	0.00352909	0.132902	0.00164613	0.000581352	0.00126684	0.0621355	3.15306	0.101027	0.0996172	0.0129397	0.00548949	0.0675164	0.00513862	0.000666301	0.00310373	0.0166392	0.00137751	0.013295	0.0178973	0.00624128	0.0128309	0.000342675	0.0298321	0.0224786	0.00107491	0.000757143	0.0324647	0.0387495	0.0165736	0.367236	0.0187733	0.0106266	0.00806256
A011	0.0353202	0.00162452	0.0114919	0.005081	0.0095097	0.00839504	0.00395153	0.0270221	0.0367467	0.00373264	0.0217668	0.00472219	0.00148245	0.00835207	0.0141751	0.0234653	0.00538773	0.227129	0.00310946	0.00129687	0.00260827	0.0447083	1.38778	0.0779951	0.0510945	0.0699429	0.00869842	0.0828439	0.0100183	0.00107457	0.00408472	0.0202482	0.00142348	0.0204557	0.0247017	0.00468472	0.0137403	0.000312325	0.0226045	0.00225966	0.000955785	0.00126837	0.0424962	0.0194731	0.00345338	0.220739	0.00597317	0.0142842	0.018089
A014	0.0111257	0.0019991	0.0209281	0.00268191	0.00243224	0.0110769	0.00138576	0.0602074	0.0704705	0.00197859	0.046146	0.00173371	0.000521649	0.0013201	0.0091551	0.00310413	0.00756503	0.163611	0.00443105	0.000626606	0.00121179	0.110078	1.49411	0.113898	0.111778	0.030753	0.00533223	0.0592075	0.00845015	0.000981645	0.00957819	0.0226589	0.00215943	0.0137711	0.0266931	0.00181404	0.0397132	0.000470656	0.0399407	0.0109626	0.000486622	0.000477184	0.0348149	0.0142347	0.00856457	0.390145	0.0123737	0.0185704	0.0226751
A017	0.0575634	0.00155388	0.0066125	0.0037814	0.00529963	0.00593561	0.00324308	0.0185848	0.0232042	0.00203609	0.0116181	0.0103927	0.00120829	0.010669	0.0156058	0.0270797	0.0045166	0.313687	0.00160241	0.00172641	0.00113171	0.0361448	1.60039	0.0588841	0.0358118	0.0769571	0.0089912	0.0730541	0.00743904	0.000640209	0.00548624	0.0144452	0.00131789	0.00402856	0.0233538	0.00605022	0.0114375	0.000322314	0.0237731	0.00202669	0.000307829	0.00125705	0.0363204	0.0235882	0.01009	0.226989	0.00673475	0.0166788	0.0123459
A019	0.0207108	0.00242663	0.00872026	0.00226035	0.014393	0.0134275	0.00199581	0.0548235	0.0573697	0.00301603	0.0312767	0.00788073	0.000624282	0.00399188	0.00939026	0.00763591	0.00296641	0.0506509	0.00160804	0.00150721	0.00193294	0.0783794	3.03616	0.0888068	0.0891916	0.0230622	0.0104008	0.060553	0.00867455	0.00142278	0.00391048	0.0180941	0.00157302	0.0229717	0.0182618	0.0233406	0.0258849	0.000359633	0.0366809	0.0246115	0.00134479	0.00135665	0.0214495	0.246408	0.00833242	0.0916051	0.173368	0.0157181	0.00585404
A020	0.0291016	0.00521089	0.0241405	0.00580015	0.00771283	0.00934727	0.00437256	0.0374496	0.056097	0.028026	0.0186206	0.00496162	0.00138973	0.00645143	0.0176408	0.0124747	0.0074635	0.0244399	0.00257325	0.00104591	0.00261759	0.0756884	3.90309	0.0649393	0.120569	0.0273839	0.0135624	0.133631	0.0148106	0.000940645	0.00451015	0.0239289	0.001798	0.02181	0.0430594	0.0270954	0.0216517	0.000343212	0.0384677	0.0278961	0.00145856	0.00126056	0.0211545	0.31082	0.0395219	0.196014	0.208605	0.0146069	0.00677332
A021	0.0301299	0.00838364	0.0191296	0.012685	0.00446122	0.0140902	0.00418406	0.0390075	0.0490232	0.00749357	0.0230076	0.00733949	0.00173662	0.00464339	0.0174808	0.0153193	0.0105151	0.299029	0.00564816	0.00215564	0.000727381	0.0918993	1.78192	0.0640285	0.0785754	0.245985	0.0149435	0.168696	0.0170856	0.00143838	0.00901883	0.0175831	0.00220449	0.00146598	0.0216778	0.0148082	0.0174937	0.000350788	0.019814	0.00400917	0.000425678	0.000746453	0.0290997	0.0147395	0.0432681	0.154281	0.00563032	0.0297571	0.0228264
A022	0.402089	0.0027123	0.0025123	0.00453432	0.00512243	0.00704455	0.00461271	0.0181946	0.0210475	0.0148618	0.0246662	0.00715167	0.00138401	0.00455707	0.0227374	0.00877344	0.00570418	0.13042	0.00331379	0.00705322	0.00325706	0.046744	2.26624	0.0239655	0.123425	0.0859597	0.0170972	0.117122	0.0291122	0.000513609	0.00628568	0.0278229	0.00333182	0.0233603	0.0497327	0.0122261	0.0130746	0.000829985	0.0152372	0.0044589	0.0012901	0.00244924	0.0193946	0.0732142	0.15386	0.149281	0.0075993	0.158796	0.00439155
A025	0.0285121	0.00278882	0.00448583	0.00323248	0.0123555	0.00942094	0.00264556	0.0200948	0.0298107	0.00129971	0.0233183	0.00636047	0.000817022	0.00554333	0.00959798	0.00956183	0.00363996	0.184474	0.00196798	0.00637858	0.00146849	0.0561169	2.97481	0.107352	0.0943687	0.0188064	0.0111024	0.0703929	0.00527217	0.00129302	0.00394429	0.0127289	0.00134779	0.0324237	0.0239936	0.00740121	0.015219	0.000474119	0.0180372	0.0163053	0.00141784	0.000996241	0.0428996	0.0476486	0.0207496	0.245888	0.0138327	0.00945266	0.00805533
A026	0.0381253	0.00632285	0.0175031	0.00652523	0.00675197	0.0138573	0.00527344	0.0446873	0.0535116	0.00202783	0.0260342	0.00641922	0.00160321	0.00488051	0.014516	0.0107612	0.00802966	0.12079	0.00544109	0.00104688	0.00316333	0.0588637	2.75866	0.0607275	0.0866608	0.0580993	0.0182313	0.128977	0.0104016	0.00139477	0.0044195	0.02044	0.00231704	0.00357553	0.0237991	0.00879303	0.0207961	0.000380267	0.0319759	0.00666471	0.000736764	0.0015754	0.0246164	0.0173612	0.0126588	0.353141	0.0120256	0.0237186	0.0197216
A027	0.0385906	0.00228833	0.00616759	0.00283026	0.00552418	0.00653363	0.00462823	0.0125364	0.0133115	0.00409132	0.00907007	0.00354059	0.00153151	0.00444314	0.0101059	0.00983832	0.00570756	0.27498	0.000826414	0.000478253	0.00279175	0.0184784	0.59993	0.0555486	0.0229987	0.0898601	0.0134006	0.0317576	0.00391689	5.58313e-05	0.00170663	0.00565026	0.000770118	0.00167168	0.0119546	0.00239586	0.00610636	0.00030904	0.00899613	0.002396	0.000437644	0.00106821	0.0211219	0.00702038	0.00449042	0.100645	0.00529869	0.0179079	0.00610287
A028	0.0186018	0.00178463	0.0056231	0.002737	0.00687757	0.00892143	0.00154315	0.0266064	0.0323862	0.00200103	0.0244946	0.00407098	0.000454673	0.00339007	0.00809879	0.00557182	0.00448402	0.265078	0.00247289	0.00517119	0.00156914	0.0668851	2.61589	0.169722	0.112663	0.0200764	0.00948399	0.0656751	0.00669604	0.000928379	0.00275574	0.00930962	0.000648218	0.00897509	0.017975	0.00633823	0.010226	0.0002183	0.0215719	0.016995	0.000784925	0.000815295	0.0322531	0.0244652	0.0381963	0.332369	0.015746	0.00769272	0.00791063
A029	0.0323962	0.00302123	0.00579612	0.00437821	0.0367425	0.00790606	0.0052631	0.0217261	0.0247562	0.00412425	0.0189118	0.00380768	0.00112468	0.00546304	0.0127174	0.00766325	0.00567771	0.131887	0.00271065	0.00751203	0.0050015	0.0389515	3.18807	0.1069	0.0730882	0.0169611	0.0145644	0.0733468	0.00522636	0.000848272	0.00250495	0.0109554	0.000859975	0.0372018	0.0186589	0.00608667	0.00830636	0.000306057	0.012915	0.0135792	0.00146824	0.00220039	0.0261866	0.048034	0.000830142	0.295253	0.0151149	0.0117014	0.00599134
A030	0.0307063	0.00408274	0.0157063	0.00409416	0.00599469	0.0109423	0.00361537	0.0416545	0.0531479	0.00256214	0.0344565	0.00439065	0.000980152	0.00314329	0.0101184	0.00668672	0.00555715	0.166645	0.00328545	0.000595599	0.00202963	0.061808	2.19441	0.0912676	0.0733054	0.0369343	0.0125518	0.0807341	0.0106459	0.00142645	0.00419275	0.0180727	0.00165793	0.0262	0.0284311	0.00822543	0.0225127	0.00038718	0.0356403	0.0179645	0.000930754	0.000909525	0.0261882	0.0248766	0.0215633	0.332488	0.0190751	0.0203277	0.0075959
A031	0.0227792	0.00266379	0.0115593	0.00317145	0.00793925	0.00899808	0.00223236	0.0208374	0.036992	0.00236017	0.0258951	0.00490466	0.000943662	0.00423901	0.0116207	0.00799408	0.00469201	0.152616	0.00264017	0.00590445	0.00109209	0.051737	3.12371	0.0920502	0.0819204	0.0218764	0.0105502	0.0574861	0.00815673	0.000755188	0.00565264	0.0130485	0.00113643	0.0111912	0.0229236	0.0110731	0.0156763	0.000474106	0.0255821	0.0188034	0.000933235	0.00122485	0.0235855	0.183964	0.000883145	0.361753	0.0166915	0.00786732	0.00748492
A032	0.0441895	0.0029869	0.0118902	0.00459321	0.00493999	0.00847533	0.00377093	0.0206007	0.0261667	0.00405035	0.0141301	0.00298975	0.00124452	0.00493804	0.0139675	0.00839685	0.00678937	0.455858	0.000555543	0.000707292	0.000876794	0.067141	1.36244	0.0254601	0.0566169	0.175007	0.0129825	0.0983109	0.013873	1.56165e-05	0.00422525	0.0144203	0.000990464	0.00977849	0.0241491	0.00449299	0.0137009	0.000359945	0.0155061	0.00323441	0.000781938	0.000933917	0.0274802	0.0130882	0.031613	0.156066	0.00495435	0.0241327	0.0107554
A034	0.0328578	0.00298244	0.0119953	0.00426268	0.00789986	0.012976	0.00628697	0.0488562	0.0679868	0.00326743	0.0535636	0.00353998	0.00108525	0.00496033	0.00916375	0.00542656	0.00449918	0.0158173	0.00209861	0.00138724	0.00285733	0.0835539	2.89419	0.0694872	0.0804601	0.0246707	0.0139408	0.0779476	0.011638	0.00117293	0.00314526	0.0232666	0.00181688	0.0340929	0.0235178	0.00772184	0.0285782	0.000342316	0.0488849	0.0241928	0.00128339	0.00115466	0.0167091	0.0225367	0.00071854	0.493919	0.0244184	0.0168709	0.00710081
A036	0.0265743	0.00359733	0.00564298	0.00359194	0.00807189	0.010453	0.00355067	0.0432914	0.0497155	0.00225354	0.0361454	0.00480078	0.00071086	0.00407585	0.0151158	0.00892632	0.00788435	0.0872924	0.0033881	0.00104511	0.00207382	0.0645491	2.93605	0.103155	0.0925943	0.0212547	0.0130729	0.0582328	0.00653703	0.0014941	0.00356371	0.0148658	0.0013032	0.0145966	0.0168059	0.00803696	0.0124243	0.000241243	0.0359592	0.0208833	0.000888558	0.00117416	0.0328898	0.0494181	0.0214975	0.364676	0.0194812	0.0132179	0.00867968
A041	0.037107	0.00352842	0.00732122	0.00403874	0.0107621	0.0115381	0.00431663	0.0233701	0.0371662	0.00339854	0.0296997	0.00389025	0.00130234	0.00465872	0.0167205	0.0101208	0.00762584	0.0698132	0.00293406	0.00809444	0.00270068	0.0669371	3.15619	0.109765	0.0912531	0.0181008	0.0185908	0.0813442	0.0082983	0.000839211	0.00269144	0.0141364	0.00147541	0.0184296	0.0183206	0.00710177	0.021116	0.000463687	0.0309963	0.0189224	0.0010204	0.00139899	0.0409547	0.0395563	0.0145398	0.347792	0.0192595	0.0110625	0.009574
A042	0.0360332	0.00471925	0.0198984	0.0031381	0.00387744	0.0104067	0.00208598	0.0434364	0.0509838	0.00267836	0.0236439	0.00623387	0.00123347	0.00227107	0.01238	0.00612952	0.00619525	0.217931	0.0127302	0.000504181	0.00243425	0.046768	2.46897	0.0857354	0.0719272	0.058754	0.00912071	0.0820087	0.0078396	0.000884669	0.00342511	0.0213506	0.00149523	0.00837646	0.0245558	0.00799657	0.0216943	0.0003327	0.0304517	0.00491312	0.00049062	0.000929926	0.0161213	0.0129536	0.00818335	0.366369	0.0107066	0.02638	0.021506
A044	0.0667514	0.00243378	0.00792509	0.00615851	0.0179205	0.00570901	0.00448148	0.00430367	0.00907596	0.00694337	0.00688554	0.00306431	0.00151565	0.00448457	0.0118542	0.00829415	0.00714751	0.321202	0.00223793	0.000956049	0.00195985	0.0324093	2.43644	0.000935623	0.0664689	0.0304121	0.0167882	0.0429395	0.00900062	0.000295019	0.00306384	0.00983968	0.000848246	0.0345031	0.0204058	0.00298001	0.00610222	0.000476774	0.00304509	0.00180857	0.00119667	0.00182998	0.0235021	0.0251843	0.0274306	0.0874871	0.006022	0.00736247	0.00416476
A045	0.0619324	0.00338961	0.0289672	0.0050712	0.00645912	0.00832349	0.00331235	0.0130934	0.0212126	0.00300226	0.011889	0.00517404	0.00108381	0.00496731	0.0216986	0.0129547	0.00905948	0.497006	0.00343693	0.000643176	0.00173116	0.0461794	1.34701	0.136735	0.0700886	0.0422994	0.014486	0.0875175	0.00884012	0.000711757	0.00568568	0.0154345	0.000610294	0.00665967	0.0383139	0.0044623	0.0087609	0.000269503	0.0149443	0.00200268	0.000339131	0.00152098	0.0533194	0.0191242	0.00410569	0.215908	0.00660588	0.0166102	0.0133821
A046	0.0488589	0.00198159	0.00580726	0.00707197	0.00368911	0.00539035	0.00355537	0.0124981	0.0179643	0.0528854	0.0154775	0.00433125	0.00117317	0.0041334	0.0121942	0.00506963	0.00390434	0.249073	0.00107174	0.00359692	0.00227963	0.0495778	2.336	0.0192711	0.061611	0.0371681	0.0122951	0.0866029	0.00241513	0.00011458	0.00781605	0.0289789	0.00845933	0.0161046	0.0332091	0.0480087	0.0117256	0.00958912	0.0223436	0.00998998	0.00105586	0.00968995	0.0176287	0.375455	0.0854332	0.204417	0.0104546	0.0294971	0.00388206
A047	0.0200052	0.0030285	0.00421241	0.00234564	0.00231094	0.00714013	0.00163159	0.0253195	0.0337181	0.00111048	0.0204515	0.00767764	0.000494156	0.00192862	0.00720075	0.00648266	0.00264456	0.254707	0.00117672	0.000478964	0.000930622	0.0370659	2.92151	0.0301966	0.0598844	0.049425	0.00649467	0.0525005	0.00891532	0.0004635	0.0224917	0.0124058	0.000771223	0.00238622	0.0169709	0.00959339	0.00662963	0.000182579	0.0144942	0.0135177	0.000712001	0.000673506	0.0217058	0.0541924	0.0599726	0.235074	0.00979196	0.00940916	0.00571665
A050	0.040629	0.00208335	0.01374	0.00505144	0.005649	0.00925132	0.00345354	0.0198587	0.0321969	0.00239045	0.0283661	0.00657686	0.000803644	0.00472878	0.0148287	0.00647585	0.00724263	0.299019	0.00261938	0.00232053	0.00289929	0.0532352	2.33478	0.029521	0.0631782	0.0831821	0.0132974	0.0892054	0.0139834	0.000135718	0.0273293	0.0223558	0.00105236	0.00748511	0.0294381	0.00638125	0.0185448	0.000382646	0.0202661	0.00451937	0.000712608	0.00105213	0.0431521	0.0290565	0.0368098	0.187272	0.0063865	0.0238205	0.0119185
A051	0.017356	0.00445311	0.015527	0.00608726	0.00349031	0.00426565	0.00172743	0.0478783	0.0484687	0.00116532	0.0203196	0.00883644	0.00073507	0.00344639	0.0108332	0.00971244	0.00536329	0.272626	0.00109422	0.00071936	0.000928039	0.060705	2.29266	0.0388705	0.0593835	0.160812	0.0107268	0.0987821	0.0143046	0.00115572	0.00703131	0.0152505	0.00136433	0.00204361	0.0236192	0.0223648	0.010711	0.000253816	0.026908	0.0162199	0.00056709	0.000788976	0.0181815	0.0426929	0.0305412	0.257784	0.0189038	0.0135553	0.00711705
A053	0.0454448	0.0016439	0.0066212	0.00277646	0.0162544	0.00757652	0.00208678	0.0129241	0.0252071	0.00131445	0.0206631	0.00536125	0.00102113	0.00246424	0.0106856	0.00494877	0.00376661	0.121341	0.00168602	0.0116539	0.00181904	0.0561007	3.97499	0.111245	0.0905563	0.0156156	0.00900029	0.0920683	0.00658323	0.000390789	0.00200219	0.0105031	0.000998768	0.0208725	0.0181036	0.008526	0.0136505	0.000341588	0.0208003	0.0190525	0.00105799	0.000970427	0.0271199	0.041754	0.00916317	0.346756	0.0310421	0.00879133	0.00670666
A054	0.0788343	0.0014678	0.00637967	0.00420445	0.00387194	0.0065233	0.00500874	0.0151471	0.0230569	0.00351426	0.0151535	0.00240318	0.000846998	0.0102174	0.0109043	0.0222828	0.00710816	0.298133	0.0043052	0.00144533	0.00149666	0.0380281	1.08834	0.084884	0.0445295	0.0434055	0.01193	0.0546018	0.00984736	0.000564725	0.000846605	0.0151603	0.00134204	0.0134942	0.0185587	0.00372865	0.0122521	0.000414881	0.0158956	0.00177746	0.000606196	0.0012133	0.0295815	0.00782544	0.0119144	0.153387	0.0049656	0.0110991	0.0110886
A055	0.0779585	0.00196026	0.00536926	0.00395122	0.0393665	0.010741	0.00355642	0.0184781	0.0282348	0.0104566	0.0224943	0.0041879	0.00156644	0.00576709	0.0120138	0.00705834	0.00410915	0.172472	0.00229668	0.00106755	0.0014305	0.0610232	2.54346	0.0592331	0.0866551	0.0154722	0.0157538	0.0386897	0.00611698	0.000619605	0.00310708	0.0132225	0.000767202	0.0373417	0.0161062	0.00966046	0.0192493	0.000293169	0.0240348	0.0154403	0.00139837	0.00124432	0.0242253	0.104906	0.000956771	0.191775	0.0825622	0.00531437	0.00571894
A056	0.0609483	0.00283677	0.019737	0.00453905	0.00498678	0.010698	0.00333302	0.0387564	0.0483888	0.00299607	0.0306806	0.00374356	0.00068069	0.00626705	0.0115155	0.00806916	0.00928215	0.191324	0.00241564	0.00354767	0.00209946	0.0657813	1.52869	0.0755959	0.051172	0.0583889	0.0154589	0.0719844	0.0105218	0.00123959	0.00414794	0.0230625	0.00207865	0.0151023	0.0222002	0.00505021	0.0199753	0.00029839	0.0309827	0.0156558	0.000857943	0.00132786	0.028809	0.01033	0.00786881	0.312902	0.0143974	0.0200063	0.00902021
A057	0.268758	0.00415507	0.00680286	0.00673612	0.00642238	0.00529244	0.00337374	0.0221273	0.0256797	0.0494954	0.0059636	0.0083405	0.00224398	0.00379223	0.0135892	0.0114921	0.00681904	0.0281477	0.00314396	0.00116428	0.00144137	0.0162336	0.345337	0.00985609	0.0206636	0.0411874	0.018244	0.0947915	0.00165068	0.000259564	0.00166734	0.0366986	0.0132311	0.0236869	0.0240019	0.0644834	0.0137837	0.00778003	0.0151991	0.0107083	0.00119537	0.0171607	0.00780128	0.474646	0.0924929	0.0541715	0.00861776	0.158301	0.00288197
A058	0.0723575	0.00308216	0.0121633	0.00394911	0.0104242	0.00533445	0.00344539	0.0101639	0.0162948	0.00257678	0.0117549	0.00262157	0.000701253	0.00219977	0.00847452	0.0071915	0.00717182	0.440998	0.001872	0.000955093	0.00116696	0.0267544	1.14913	0.0063232	0.0307308	0.0681017	0.010427	0.0488121	0.00646459	0.000545588	0.00397644	0.0112816	0.000624136	0.0487514	0.0141282	0.00415645	0.00549159	0.000295347	0.00959116	0.00386703	0.00161003	0.000936622	0.0222842	0.0196151	0.00588718	0.1062	0.00447222	0.00942339	0.00414948
A059	0.0601593	0.00293769	0.0199946	0.00513022	0.00384825	0.0104776	0.00270538	0.0313005	0.0400953	0.00195667	0.0250055	0.00746191	0.00123277	0.00390621	0.0130709	0.0110483	0.00738755	0.242856	0.00350204	0.00240451	0.00134472	0.063293	1.64873	0.0926685	0.0520586	0.0538845	0.0118146	0.0803105	0.0128308	0.000912631	0.004489	0.0206632	0.00179905	0.00735467	0.0273272	0.00720648	0.0151026	0.000389325	0.0281408	0.00965305	0.000428333	0.000808642	0.0376934	0.0860936	0.0128954	0.290046	0.011038	0.0256722	0.0115231
A060	0.0508902	0.00357366	0.0184382	0.00375732	0.00334387	0.0106533	0.00289597	0.0387286	0.0461063	0.00238595	0.0201876	0.00549524	0.00121545	0.00283465	0.0130458	0.00636155	0.00591017	0.161819	0.0156027	0.000276779	0.00207066	0.0492666	2.57231	0.0957444	0.0744667	0.0397982	0.0057052	0.0867232	0.00849192	0.00126196	0.00495993	0.0164336	0.000958132	0.0250599	0.0220098	0.00947423	0.0199581	0.000614564	0.0258065	0.00451004	0.00089895	0.00103121	0.0231725	0.0104746	0.00926888	0.333756	0.00987813	0.0220044	0.0188873
A062	0.0218264	0.0036007	0.0108471	0.00302091	0.0058215	0.0113647	0.00286448	0.0429638	0.0450883	0.0179791	0.0127086	0.00766915	0.000715415	0.00285375	0.0140207	0.0057409	0.00440372	0.0806708	0.00122584	0.00912236	0.00165473	0.0708783	2.99738	0.121283	0.0858353	0.0149792	0.0140341	0.0925283	0.00574439	0.000192874	0.00271647	0.0139763	0.00150112	0.00730582	0.0151364	0.0161177	0.0161087	0.000247826	0.0322707	0.0240716	0.000888092	0.0010806	0.0286042	0.108582	0.0695955	0.301674	0.0616417	0.0152685	0.00648477
A063	0.118875	0.0016922	0.00218042	0.00352942	0.00467689	0.00575148	0.0035033	0.0191173	0.0217311	0.0132239	0.0225182	0.00466843	0.00166355	0.00348338	0.0137106	0.00685686	0.00683143	0.177672	0.00182959	0.00133857	0.00445832	0.0391172	2.4263	0.0269741	0.132028	0.0822998	0.0133103	0.0766364	0.00278095	4.94766e-05	0.0347977	0.0256675	0.00867119	0.0360753	0.0393366	0.0101708	0.0147861	0.00424287	0.0151787	0.00439599	0.00222187	0.00108578	0.0174297	0.236535	0.166085	0.138918	0.00371999	0.059359	0.00378196
A064	0.0249386	0.00503802	0.0100045	0.00371609	0.00308309	0.0143607	0.00166666	0.0626454	0.0709481	0.00191061	0.0541105	0.00876094	0.000608441	0.00268228	0.011006	0.00420883	0.00302056	0.111635	0.000310167	0.0004328	0.00109219	0.0914205	2.88334	0.0696143	0.0684566	0.0464156	0.00917892	0.0816931	0.0135971	0.00174194	0.00481415	0.0173897	0.00226628	0.00385867	0.0203278	0.00954562	0.0241066	0.000355868	0.0332747	0.0199492	0.000585591	0.000629721	0.0208119	0.0248914	0.0322895	0.378639	0.0195709	0.014839	0.0138278
A065	0.0624523	0.00376729	0.00508898	0.00429779	0.00476068	0.00592186	0.00334017	0.0153926	0.0191202	0.0631771	0.0445878	0.00474476	0.00325567	0.00533741	0.0151408	0.00817939	0.00731055	0.0291996	0.0029057	0.00112564	0.00243654	0.0149652	0.569061	0.0132832	0.0241096	0.0315425	0.0190155	0.152882	0.00258202	6.49215e-05	0.00390998	0.0561512	0.0184864	0.0236484	0.0233436	0.0542412	0.0289576	0.0261531	0.0210509	0.00247347	0.00117283	0.0252774	0.0124368	0.96462	0.184614	0.133018	0.00987376	0.0863963	0.00141512
A066	0.0298848	0.00202633	0.0120588	0.00492216	0.0118969	0.00544415	0.00408455	0.00801299	0.0115016	0.00361984	0.00840018	0.00382822	0.00194126	0.00469026	0.0137936	0.0137459	0.00936458	0.359496	0.0015695	0.00191182	0.00203707	0.0244514	0.878619	0.0134648	0.0353024	0.0956749	0.00716056	0.0337879	0.00573974	0.000181157	0.00239274	0.00909879	0.000694744	0.0235441	0.014616	0.0028515	0.00898828	0.000248755	0.00871135	0.00254944	0.000994237	0.00142464	0.0178821	0.00772466	0.00938328	0.102715	0.00767575	0.0110805	0.00473573
A068	0.0474536	0.00289792	0.00959727	0.00324493	0.012408	0.0122522	0.00193574	0.0388036	0.0449557	0.001763	0.0254218	0.00910154	0.00115576	0.0036142	0.00865631	0.00668323	0.00513547	0.173861	0.00215279	0.000514028	0.00341469	0.0617748	2.53767	0.0751149	0.061577	0.0424987	0.0118619	0.0830051	0.00597693	0.00130886	0.00486762	0.0158855	0.00174794	0.0151589	0.0167544	0.00976047	0.00573421	0.000332905	0.0209177	0.0202706	0.00146163	0.000958961	0.0300307	0.114859	0.114496	0.282874	0.016242	0.0103648	0.00636277
A069	0.0447571	0.00455304	0.00776699	0.00524099	0.00445654	0.00899333	0.00413715	0.0326872	0.0360498	0.00245388	0.0219075	0.00393352	0.00142989	0.00442983	0.0160257	0.00851449	0.00443019	0.20889	0.00424833	0.00182991	0.00176434	0.0909412	1.81828	0.0666893	0.0722659	0.0602745	0.0136715	0.0691839	0.0133554	0.00101554	0.00226576	0.0126897	0.000792308	0.0104809	0.0378966	0.00427014	0.0224623	0.000678674	0.0204562	0.00275946	0.000868054	0.000911836	0.035697	0.0181573	0.103305	0.301707	0.00819549	0.032368	0.019392
A070	0.0379679	0.00360044	0.00360169	0.00453775	0.00542594	0.0124983	0.0042696	0.0104347	0.0153915	0.0388889	0.0271044	0.00799468	0.00172673	0.00345077	0.014021	0.0125737	0.0057112	0.0456969	0.00320363	0.000794203	0.0025751	0.049811	2.63169	0.042989	0.072701	0.0591357	0.0114068	0.131564	0.00265133	0.000238262	0.00962365	0.028804	0.0127568	0.032263	0.0366715	0.0519198	0.0156692	0.0149154	0.0294113	0.00497249	0.00157082	0.0115026	0.0299543	0.465214	0.1541	0.182957	0.00832353	0.086335	0.00992268
A071	0.0398832	0.00377227	0.0129321	0.00457237	0.00667277	0.00628224	0.00290354	0.0134353	0.0174652	0.00305393	0.0115858	0.00493573	0.00117407	0.00454052	0.0144998	0.00865995	0.00746362	0.780953	0.00277506	0.0033796	0.00183607	0.0513581	1.62635	0.00355799	0.0640677	0.0711313	0.0129352	0.0602387	0.0104592	0.000449934	0.00323997	0.013379	0.00108367	0.00843718	0.0208397	0.00325559	0.0088954	0.000323672	0.012345	0.00374047	0.00063482	0.00139087	0.0434627	0.0179664	0.0153012	0.136586	0.00527768	0.0218281	0.00936488
A073	0.0680484	0.00335164	0.00508341	0.00250721	0.00374847	0.00840189	0.00244136	0.0201848	0.0297015	0.00183228	0.0163162	0.00561138	0.000641044	0.00457873	0.0100769	0.00464628	0.00405897	0.270053	0.00102616	0.00715748	0.0018634	0.0348903	2.59296	0.0042807	0.045564	0.0401852	0.0108691	0.0475991	0.00404605	0.000586276	0.00268259	0.00951558	0.00119449	0.00308387	0.0187941	0.00812756	0.00589733	0.000168566	0.0186219	0.0141566	0.000597484	0.000898856	0.0218782	0.027982	0.0394455	0.235915	0.0126708	0.0114494	0.00556593
A074	0.29387	0.0033322	0.00323204	0.00732688	0.00569044	0.00618427	0.00372348	0.00569102	0.00596772	0.0292578	0.0302846	0.00424978	0.00188312	0.00593778	0.0138153	0.00871937	0.00718552	0.280091	0.0021739	0.00180384	0.00194308	0.0441705	1.79296	0.00151313	0.0423415	0.0874431	0.00786762	0.0974304	0.0137495	6.43076e-05	0.00133773	0.019359	0.00916193	0.0114373	0.0289684	0.0304581	0.00461228	0.00231826	0.0166506	0.00935485	0.000587506	0.0086349	0.0219819	0.517045	0.133265	0.333918	0.0108952	0.0529133	0.00669353
A075	0.0577685	0.00349946	0.0210196	0.0056381	0.00764294	0.0101963	0.00356113	0.0285154	0.0336076	0.00295241	0.0232496	0.00344547	0.000976382	0.0102032	0.0162101	0.0227583	0.0103188	0.255354	0.0104027	0.00259514	0.00444812	0.0412467	1.32126	0.0959855	0.0564713	0.0346509	0.0189689	0.0889465	0.0144785	0.000772349	0.00430689	0.0203842	0.00133408	0.011254	0.0355859	0.00476905	0.0151188	0.000234112	0.0243535	0.00304106	0.000466301	0.00124939	0.0460504	0.0337236	0.00763188	0.267802	0.00774441	0.0163318	0.0173567
A076	0.0412762	0.00159371	0.0150004	0.00427588	0.00948626	0.0120291	0.00380754	0.034749	0.0452898	0.00300511	0.0247727	0.00768281	0.00145039	0.00976224	0.0131616	0.0161505	0.00587315	0.160088	0.0048684	0.00438329	0.00179216	0.0554971	2.17495	0.0858923	0.0521366	0.0646367	0.0201024	0.0913942	0.0171852	0.00170487	0.00371769	0.0199214	0.00128877	0.0099022	0.0315921	0.00710581	0.0165883	0.000399574	0.0214078	0.0109262	0.00082566	0.00102251	0.0396596	0.0456636	0.0180397	0.168133	0.0117938	0.0145203	0.0099718
A078	0.0336692	0.00365934	0.00764951	0.00348575	0.00966365	0.00900584	0.00337551	0.0244961	0.039691	0.00260809	0.0270677	0.0045945	0.000749478	0.00499139	0.0154072	0.00870879	0.00441341	0.133558	0.00213734	0.00830757	0.00135231	0.0551012	3.33143	0.0782736	0.0751989	0.0338096	0.013166	0.0740456	0.00938261	0.000700417	0.0123604	0.01913	0.00157549	0.00882877	0.0206036	0.00910192	0.0127623	0.000485761	0.0233708	0.0147671	0.00101484	0.00160533	0.0287212	0.142443	0.128338	0.313577	0.0161204	0.00749664	0.00670014
A079	0.0424101	0.00426594	0.0147545	0.00517931	0.00618364	0.00906791	0.00556645	0.0232992	0.028243	0.00541069	0.0297133	0.00555437	0.00122439	0.00561607	0.013489	0.0104697	0.00707718	0.277715	0.00409981	0.00136905	0.00367499	0.0477445	2.3757	0.119809	0.0771304	0.0267733	0.0138568	0.0402853	0.00798553	0.000518887	0.00319744	0.013611	0.000961393	0.0137117	0.0195137	0.00664638	0.0148137	0.000306057	0.0192822	0.00856431	0.000790286	0.00122091	0.017504	0.0196214	0.018877	0.233948	0.00933585	0.0110485	0.00512442
A081	0.0334098	0.0070558	0.00636406	0.00361329	0.00580888	0.00835358	0.00333932	0.0284589	0.0380117	0.00255368	0.0249741	0.00465832	0.00065715	0.0055735	0.0144132	0.00694226	0.00537659	0.095046	0.00194291	0.0117247	0.00246882	0.0580869	4.30669	0.0620292	0.1078	0.020619	0.014354	0.0940038	0.00535988	0.00152178	0.00365682	0.0153314	0.00149691	0.00741207	0.0278998	0.00858747	0.014484	0.000327063	0.0231344	0.0208581	0.00088328	0.00141042	0.0372763	0.0767876	0.000793891	0.364203	0.0199675	0.0159739	0.00810017
A082	0.0387897	0.00430407	0.00700262	0.00345447	0.0183107	0.00932415	0.004671	0.0196231	0.0309429	0.00289536	0.0220345	0.00790484	0.000864734	0.00545521	0.0109724	0.0120547	0.0064587	0.212911	0.00216015	0.00626882	0.00187858	0.0494567	2.54781	0.101797	0.0594063	0.0207923	0.0104918	0.0833316	0.00436659	0.000852236	0.00300886	0.0116453	0.00094046	0.018655	0.0149494	0.00797777	0.0128625	0.00035475	0.0214493	0.0159374	0.000930761	0.00165925	0.0175198	0.151961	0.0618888	0.294682	0.0180842	0.010059	0.00584243
A083	0.0317644	0.00491155	0.0277233	0.00546392	0.00671022	0.0104342	0.00372651	0.0431696	0.0601349	0.00286971	0.0315184	0.00334119	0.00114441	0.00457268	0.0164997	0.0108049	0.00832566	0.054274	0.00235122	0.00135447	0.00181518	0.056257	3.03566	0.0719237	0.0872627	0.0280407	0.0134456	0.103507	0.0100807	0.0011402	0.00491225	0.0194172	0.00214874	0.0317676	0.0336578	0.00917011	0.0199578	0.000320056	0.0400863	0.0221847	0.00139446	0.00132023	0.0180383	0.0286212	0.0137157	0.451749	0.0226728	0.024189	0.0101429
A093	0.0274858	0.0022881	0.00627599	0.00280909	0.00428539	0.00846135	0.00222098	0.0258247	0.0335219	0.00141999	0.024516	0.00573213	0.000574499	0.0023327	0.0125606	0.00467114	0.00333402	0.1559	0.000513821	0.00221368	0.00179695	0.064802	3.4624	0.0979663	0.0938361	0.0182627	0.0097188	0.0582698	0.00443488	0.000411053	0.00242621	0.0150693	0.00124002	0.0134361	0.0174117	0.00602332	0.0117815	0.000254672	0.0250227	0.019274	0.000788854	0.000720449	0.0359337	0.0317876	0.0303962	0.339602	0.0176702	0.00700324	0.00809321
A096	0.0288502	0.00342804	0.0084354	0.00211053	0.00506705	0.00971562	0.00177407	0.0393138	0.0423769	0.00204183	0.0232528	0.00477058	0.000520687	0.00379639	0.00862171	0.0065352	0.00433582	0.290468	0.00178454	0.00463833	0.00166703	0.0508213	2.9357	0.148338	0.088357	0.0212709	0.0211386	0.0563333	0.00626094	0.000793222	0.00324728	0.0152245	0.0012403	0.00875521	0.0167546	0.00900415	0.00844885	0.000258428	0.0254913	0.0137937	0.000788289	0.000666816	0.0213354	0.0375586	0.0100151	0.310429	0.0290874	0.0101817	0.012213
A100	0.0339307	0.00381206	0.00465323	0.00611491	0.00471485	0.00537979	0.00370882	0.00945525	0.00982418	0.029163	0.0262933	0.00435953	0.00141667	0.00405468	0.0163538	0.0116392	0.00665441	0.180084	0.00227025	0.00165685	0.00195662	0.0908223	2.91483	0.0512426	0.153769	0.136362	0.0209175	0.141542	0.0181717	6.71165e-05	0.00244158	0.0222576	0.0141063	0.0340233	0.0347852	0.0241525	0.0214246	0.0122377	0.0247973	0.00332671	0.00238274	0.00543166	0.0533619	0.092379	0.113381	0.197204	0.00538386	0.0661154	0.0127839
A103	0.0283309	0.0022177	0.00347169	0.00219131	0.00312944	0.00651093	0.00189498	0.0147565	0.0260136	0.00162321	0.0198255	0.00361503	0.000575648	0.00211838	0.0102557	0.00581803	0.00262554	0.214795	0.00159042	0.000547335	0.000770189	0.0545162	3.41452	0.000377588	0.0755697	0.0754789	0.0108307	0.0522663	0.0195736	0.000585961	0.0356873	0.0111816	0.000973829	0.00661686	0.0163696	0.00930356	0.00759314	0.000279468	0.00838283	0.00982309	0.000949765	0.00096608	0.0238828	0.0945964	0.0887395	0.219074	0.0130517	0.00397264	0.0053111
A107	0.0534885	0.00526578	0.0238418	0.00650444	0.00784804	0.00957319	0.00352704	0.0300115	0.0364124	0.00374493	0.0250725	0.00427469	0.00122246	0.00452418	0.0158267	0.0110124	0.00939459	0.0975964	0.00195148	0.00380017	0.00129982	0.050449	2.04567	0.0431187	0.0606589	0.057992	0.00703442	0.0647538	0.0171476	0.000621143	0.0131031	0.0257639	0.00218528	0.0184182	0.0480975	0.00524427	0.0136989	0.000599786	0.028268	0.00969097	0.00100332	0.00149731	0.0391203	0.0314031	0.0172769	0.284833	0.00669889	0.0141116	0.00923053
B001	0.0407208	0.0066518	0.00366295	0.0050735	0.00451634	0.00471383	0.00318564	0.0281086	0.0320845	0.0390282	0.036692	0.00590653	0.00140479	0.00418114	0.0135591	0.0134893	0.0054411	0.0304105	0.00274109	0.00150257	0.00167291	0.0469512	1.30715	0.0252872	0.0393975	0.0377722	0.0138857	0.166662	0.00271198	0.000347073	0.00535403	0.0456492	0.0227718	0.0209755	0.0643065	0.0280818	0.0290638	0.0352466	0.0339965	0.0156013	0.00196477	0.00314627	0.046344	0.547184	0.312985	0.493054	0.0173288	0.170058	0.0122831
B002	0.0627568	0.00506687	0.0200636	0.00440037	0.00572943	0.0126065	0.00372079	0.0514484	0.0665588	0.002554	0.0363239	0.00409938	0.00116997	0.00356476	0.014474	0.00832391	0.00409991	0.0297282	0.00597147	0.00088832	0.00493095	0.0798215	3.04536	0.0867486	0.103109	0.0199462	0.0193589	0.064091	0.00896083	0.00108742	0.00363494	0.0194103	0.00193196	0.0219428	0.0301032	0.00850459	0.0234045	0.000418142	0.0382952	0.023022	0.0011182	0.000944024	0.0245842	0.0182175	0.0614474	0.472019	0.0212336	0.02337	0.0133607
B003	0.0245609	0.00321123	0.0202705	0.00428628	0.00420719	0.0104618	0.00228971	0.0476147	0.0596072	0.00218179	0.0338581	0.00555549	0.00111538	0.00275135	0.0145228	0.00497184	0.00533417	0.095602	0.00465959	0.000562513	0.00175967	0.0681946	2.78957	0.0760628	0.0935951	0.029686	0.00896202	0.0744806	0.00948268	0.00134742	0.00396432	0.0232432	0.00149685	0.0213656	0.0275549	0.00722358	0.0229259	0.000362324	0.0398549	0.0193696	0.000866893	0.00141124	0.0288171	0.0233975	0.0310011	0.464878	0.0208954	0.0219222	0.0114592
B004	0.0325627	0.00433964	0.02747	0.0060437	0.0154585	0.00852868	0.00216605	0.0229479	0.0333234	0.00624454	0.0141862	0.00629156	0.000868752	0.00473399	0.02199	0.0070026	0.0103238	0.160237	0.00871587	0.00376982	0.00235844	0.0774913	1.9304	0.0722549	0.0757687	0.0730494	0.0116808	0.0778529	0.0111573	0.000278668	0.0059596	0.0166148	0.000916318	0.0117229	0.0305816	0.00789346	0.0162228	0.0006997	0.0313007	0.0108806	0.00100372	0.000887686	0.0594801	0.0560374	0.010219	0.310075	0.01018	0.0170825	0.0105544
B005	0.034822	0.00435972	0.0161784	0.0051601	0.0103413	0.0140096	0.00566344	0.0226972	0.0334244	0.00348759	0.022204	0.00269101	0.00201386	0.00590638	0.0145326	0.0120718	0.00686427	0.169267	0.0044959	0.000924787	0.00222966	0.0518452	2.81362	0.0923043	0.108533	0.0266777	0.0139466	0.0833103	0.00843225	0.00112364	0.00383171	0.0159803	0.000872415	0.0552207	0.0259352	0.00356246	0.0182989	0.000428865	0.0239527	0.00596514	0.00238851	0.00109326	0.0380417	0.0182216	0.0204229	0.255507	0.00832361	0.03621	0.0132521
B006	0.0480685	0.00281328	0.0269356	0.00394897	0.00406762	0.0103904	0.00303884	0.0367551	0.0457248	0.0144174	0.0107873	0.00773099	0.00109403	0.00220531	0.0138934	0.00527239	0.00792731	0.219259	0.0146201	0.00234458	0.00219136	0.0819342	1.73875	0.0621817	0.0561783	0.132726	0.0145789	0.132405	0.0123086	0.000192726	0.00445015	0.0193996	0.000980189	0.00480231	0.0314304	0.0207826	0.0156549	0.000473947	0.0252996	0.00856046	0.000861391	0.000597537	0.042403	0.0826412	0.0280639	0.232373	0.0383053	0.0156034	0.0151604
B007	0.037869	0.00322094	0.022901	0.00596035	0.0102371	0.0099523	0.00413763	0.0252362	0.0318804	0.00309511	0.0209929	0.0080632	0.00126332	0.00641075	0.0162069	0.00996777	0.00597186	0.170437	0.00416657	0.00146279	0.00226563	0.0750664	1.93703	0.0949909	0.0853073	0.03439	0.0110859	0.095316	0.00985063	0.00109623	0.00461454	0.017372	0.0012736	0.0114024	0.0309074	0.00580968	0.0203737	0.000352383	0.0283783	0.0117968	0.0014094	0.00135816	0.0571837	0.044657	0.0148979	0.33521	0.0154542	0.0229792	0.0124284
B010	0.0195878	0.0021383	0.00890375	0.00319407	0.00519862	0.0108679	0.00214655	0.0463671	0.0540509	0.00140933	0.0289164	0.00479398	0.000551105	0.0029451	0.0132826	0.00526885	0.00441592	0.124879	0.000781516	0.000626006	0.00113925	0.0607198	3.27694	0.113916	0.0985741	0.0128376	0.00839496	0.0493039	0.00486995	0.000712825	0.00331681	0.0189434	0.00169009	0.0119619	0.0195216	0.00679241	0.0154161	0.000303234	0.0249059	0.0235521	0.00107368	0.000670748	0.0373325	0.0338601	0.0205758	0.35166	0.0192614	0.0113019	0.00873343
B011	0.067753	0.00268198	0.0184544	0.0062358	0.00597383	0.0100399	0.00566798	0.0289565	0.0414161	0.00583736	0.0256307	0.00404243	0.00128926	0.00794891	0.019314	0.0177359	0.00872006	0.172009	0.0027637	0.00103193	0.00142934	0.0543566	1.36863	0.068791	0.0618796	0.0684648	0.00774846	0.0770821	0.0108162	0.00086819	0.00491051	0.0227518	0.0018034	0.0190385	0.0303374	0.00417325	0.0208691	0.00062586	0.0237202	0.00282709	0.000647394	0.000979169	0.0460089	0.0206275	0.00730881	0.262906	0.00959925	0.012394	0.0190895
B014	0.0268313	0.00227108	0.0132386	0.00444826	0.00501313	0.00968106	0.0027647	0.0371228	0.0523847	0.00499968	0.0354473	0.00320893	0.000801095	0.00375374	0.00957102	0.00633013	0.00769635	0.194491	0.00262048	0.000766804	0.00169634	0.0793969	1.91399	0.100179	0.0684766	0.0761437	0.0111173	0.0379945	0.00981558	0.000617512	0.0429531	0.0221171	0.00230964	0.0113326	0.0234509	0.00506271	0.0216176	0.000329963	0.0241459	0.00788473	0.000631231	0.000861444	0.0265308	0.0313897	0.0174299	0.299514	0.0082836	0.0229521	0.0140461
B017	0.0305156	0.00483271	0.0166759	0.00429546	0.00501434	0.010036	0.00257382	0.0378462	0.0492793	0.00256457	0.0256006	0.00403924	0.00128867	0.00411479	0.0132558	0.00638042	0.00537585	0.148681	0.00155443	0.000925868	0.00243248	0.041472	1.93998	0.104797	0.0667148	0.0257679	0.0114863	0.0681052	0.00800146	0.00120106	0.00252687	0.0172715	0.00225363	0.00472484	0.0288914	0.00839898	0.00877242	0.000425025	0.0283445	0.00343271	0.000295205	0.000647009	0.0292187	0.00906256	0.0116836	0.346548	0.00768421	0.0368073	0.0211431
B019	0.0257488	0.00139112	0.00884201	0.00393506	0.00572367	0.012135	0.0023169	0.0509594	0.0517199	0.00197485	0.0261329	0.00970707	0.000529856	0.00305593	0.0117754	0.00521042	0.0042513	0.0474394	0.0020069	0.00101454	0.0017848	0.0674562	2.87528	0.0897579	0.0950911	0.0140601	0.0127053	0.0543148	0.00584261	0.00120593	0.00308852	0.0151119	0.00184036	0.0103387	0.0181028	0.022378	0.0193944	0.000334008	0.0276489	0.0206766	0.000831275	0.000891771	0.0206001	0.131041	0.011439	0.0766105	0.164976	0.0165064	0.00481418
B020	0.0392475	0.00324546	0.0172572	0.00611815	0.00391051	0.0113051	0.00264701	0.0454019	0.0561769	0.0100039	0.0348695	0.00536352	0.000938478	0.0068306	0.0161205	0.00850121	0.00406243	0.0277374	0.00150167	0.000524262	0.00146473	0.0831964	4.36429	0.0743284	0.123711	0.0268908	0.0147011	0.103845	0.0107195	0.000749257	0.00372978	0.0201256	0.00173307	0.0109759	0.0384186	0.0230876	0.0204912	0.000484029	0.0397425	0.0216968	0.00116222	0.000898559	0.0238964	0.213098	0.0273802	0.298254	0.154596	0.0148879	0.0142652
B021	0.0451364	0.0120431	0.0137554	0.0128343	0.00583457	0.0170706	0.0029036	0.00815543	0.0232346	0.0475238	0.0139799	0.00869784	0.00269017	0.00317136	0.015829	0.0125398	0.00956972	0.0136241	0.00169283	0.00149953	0.000775395	0.11863	1.54567	0.0402334	0.131317	0.0467578	0.0164555	0.124189	0.00563132	0.00175245	0.0322793	0.018125	0.00701699	0.00439793	0.0338035	0.0539139	0.00153265	0.000299761	0.01723	0.00164869	0.000177953	0.000959422	0.0386333	0.164312	0.207803	0.273247	0.00641277	0.0344736	0.0320431
B022	0.0448565	0.00452695	0.026178	0.00593078	0.00565227	0.0102556	0.00364438	0.0432602	0.0494726	0.00269227	0.0436187	0.00328446	0.00112222	0.00345342	0.0201704	0.00721512	0.00760851	0.0754746	0.00677056	0.00067415	0.00199271	0.105167	1.91224	0.1024	0.11503	0.0246869	0.0165071	0.116374	0.0138464	0.000768165	0.00487396	0.0228495	0.0014209	0.0144153	0.0413067	0.0033275	0.0315994	0.000683055	0.0349687	0.00698739	0.000826729	0.00113018	0.056045	0.0618108	0.029754	0.378691	0.010557	0.0270988	0.0246647
B025	0.0275638	0.00241436	0.0068012	0.00297196	0.00729958	0.0100164	0.00268136	0.0407777	0.0415411	0.0014782	0.025789	0.00902286	0.00107578	0.00278697	0.00941202	0.00817114	0.00458339	0.140969	0.00140189	0.00697911	0.00163448	0.0620767	2.92935	0.107619	0.0903602	0.017816	0.0117649	0.0600827	0.00389536	0.00118262	0.00343229	0.013769	0.00121834	0.0204181	0.0169314	0.00712494	0.0122257	0.000213889	0.0229897	0.0197527	0.00136342	0.000902505	0.0370375	0.0365574	0.0139225	0.281583	0.0158827	0.0181443	0.00818854
B026	0.0595064	0.00646048	0.0293569	0.00398923	0.00656194	0.0107247	0.00397262	0.0481642	0.0617063	0.00322091	0.0313186	0.00596211	0.00229426	0.00654332	0.0170523	0.00945126	0.00920688	0.0633287	0.00786309	0.00145033	0.00242158	0.0606771	3.25331	0.0584739	0.126392	0.0492656	0.0219276	0.160788	0.0139225	0.0017563	0.00538613	0.0291404	0.00210567	0.0157454	0.0363929	0.00941749	0.0228208	0.000452037	0.0348047	0.00573338	0.00100638	0.000881449	0.0438248	0.0172774	0.0188574	0.467117	0.0118951	0.0433026	0.0266235
B027	0.0668311	0.00292781	0.0231242	0.00428147	0.00585214	0.00788561	0.00312049	0.0282014	0.0302668	0.00274604	0.0170304	0.0045144	0.00177319	0.00441307	0.0183731	0.00810809	0.007776	0.247121	0.00959344	0.00102057	0.00639817	0.0656256	1.33493	0.0596488	0.0601874	0.125256	0.0241485	0.108312	0.00657257	0.000476362	0.0032734	0.0136584	0.00111333	0.00133755	0.0270299	0.00698549	0.0102112	0.000255202	0.0288562	0.00788562	0.000676293	0.000811089	0.0441151	0.0629397	0.0289116	0.311927	0.0135797	0.0210158	0.00939805
B028	0.0234948	0.00162202	0.00507522	0.00189614	0.00377211	0.00745549	0.00140129	0.0376522	0.0396754	0.00116979	0.0232692	0.00689305	0.000525386	0.00259498	0.0102317	0.00508556	0.00269714	0.187106	0.000806543	0.00639806	0.00136831	0.0602849	3.06736	0.127653	0.0948703	0.0160926	0.00675037	0.0648251	0.00521881	0.000559171	0.00179166	0.0116613	0.00104155	0.00767579	0.0203485	0.00599021	0.0153442	0.000408322	0.0195541	0.0134164	0.000769629	0.000562706	0.032491	0.0279678	0.0130828	0.349366	0.0104764	0.0165845	0.0144681
B029	0.0471207	0.00300391	0.00621983	0.00425259	0.0183765	0.00955073	0.00345786	0.0169423	0.0248135	0.00321361	0.0178103	0.00652815	0.000959058	0.00471418	0.0159226	0.0101684	0.00602082	0.157409	0.00195137	0.00876744	0.0015633	0.0328908	3.52766	0.100001	0.0716035	0.0158357	0.0147431	0.0693327	0.00438149	0.000812755	0.00234855	0.0134105	0.00097104	0.0258965	0.0232005	0.00588459	0.0057673	0.000199009	0.0141041	0.00905808	0.00111973	0.00169741	0.0258675	0.0404103	0.00317259	0.292011	0.010179	0.0100561	0.00962022
B030	0.0369554	0.00841423	0.0165547	0.00428304	0.00443215	0.0129585	0.00477261	0.0425208	0.0563766	0.00327142	0.0362033	0.00590246	0.00156831	0.00640783	0.0158859	0.00949432	0.00724303	0.0975362	0.00293757	0.000402479	0.00139375	0.063033	2.83753	0.0771528	0.0985198	0.0358811	0.0172611	0.0839607	0.00901047	0.00114314	0.00364088	0.01764	0.00165736	0.0145142	0.03587	0.00998413	0.0252856	0.000327863	0.0314697	0.0165953	0.000785831	0.0016147	0.0299356	0.0307793	0.0209822	0.376538	0.0204072	0.0416456	0.0116468
B031	0.0236929	0.00251879	0.0112619	0.00225346	0.00492085	0.0108431	0.00243213	0.0417378	0.0503901	0.00166805	0.0261099	0.00474546	0.000867598	0.00258531	0.0100366	0.00458398	0.00467017	0.119701	0.000595747	0.00846206	0.00143877	0.0494288	3.54109	0.0980765	0.092835	0.0201417	0.00966646	0.0567959	0.00450253	0.000500009	0.00464059	0.0148039	0.00175564	0.00495934	0.0210641	0.00676661	0.0182037	0.000330946	0.0267948	0.0136703	0.000622783	0.000550237	0.0266541	0.0608297	0.00155477	0.340038	0.0111425	0.0135656	0.0144799
B032	0.0374422	0.00261554	0.0054902	0.00314915	0.00568577	0.00866805	0.00283639	0.0258738	0.030223	0.00302031	0.0203973	0.00381814	0.000993561	0.00360834	0.0133777	0.00563302	0.0039719	0.242372	0.000182602	4.03398e-05	0.000112532	0.0112376	1.71146	0.0417436	0.0666721	0.0866903	0.0123966	0.0709142	0.00858468	0.000116867	0.00284108	0.0156034	0.00125177	0.00470018	0.0267621	0.00404439	0.0186987	0.000297442	0.0209283	0.00369842	0.00064127	0.00067583	0.0287738	0.0152298	0.0386557	0.212166	0.0114733	0.0325186	0.0128743
B034	0.041473	0.00436544	0.0145277	0.00510697	0.00729034	0.00788096	0.0037439	0.0426988	0.0588322	0.00196998	0.0377694	0.0032955	0.000895565	0.00532363	0.0177328	0.00711158	0.0049565	0.0254493	0.000763535	0.00106058	0.00203164	0.0653654	3.12902	0.0718445	0.106884	0.0249667	0.014623	0.0859324	0.00960985	0.00115119	0.00308984	0.0235725	0.00240226	0.019267	0.0278289	0.00564851	0.0254089	0.000382203	0.0427182	0.0217773	0.000906095	0.00110397	0.0222017	0.0196319	0.00499771	0.507417	0.0197191	0.0202827	0.0132626
B036	0.0345051	0.00679011	0.00604092	0.00381647	0.00510669	0.00962263	0.00279603	0.0491584	0.0541208	0.00235423	0.0337093	0.00614336	0.000758611	0.00351864	0.0118856	0.00498348	0.00415549	0.0807854	0.00166281	0.00140938	0.00196699	0.057092	3.06756	0.0967461	0.0896992	0.0214283	0.0126901	0.0509251	0.00483625	0.00113959	0.00435036	0.0146143	0.00166485	0.00639147	0.0219303	0.00974971	0.0114548	0.000199032	0.0297412	0.0218654	0.000830402	0.000500457	0.0319025	0.0313494	0.0113361	0.349301	0.0190523	0.0192374	0.0088602
B041	0.053013	0.00171303	0.00984151	0.00456893	0.0111593	0.0118234	0.00357884	0.0343736	0.0386791	0.00286823	0.022501	0.0071268	0.000987917	0.0056282	0.0174924	0.00893817	0.0089908	0.0635366	0.0022269	0.0103825	0.00346405	0.0588838	3.97307	0.0861002	0.0823649	0.0204104	0.0139549	0.0689534	0.00796623	0.00104855	0.00290238	0.0142997	0.000647576	0.0196252	0.0238814	0.00814366	0.0109973	0.000451943	0.0265222	0.0186176	0.00126636	0.00121718	0.0505024	0.0812971	0.0194118	0.335408	0.0185021	0.0184485	0.00959109
B042	0.0387752	0.00758944	0.0163487	0.0066059	0.00578599	0.0102382	0.00480818	0.0250619	0.0364881	0.00427982	0.0187532	0.00509786	0.0017595	0.00492492	0.0180086	0.00541102	0.00801223	0.15494	0.00991967	0.000581513	0.00311632	0.0245461	3.08255	0.0608737	0.104589	0.0247039	0.015481	0.0734603	0.00758234	0.00117969	0.00354559	0.0219899	0.00131597	0.0262088	0.0312336	0.00737307	0.011457	0.000348305	0.0242836	0.00410956	0.00109566	0.00106505	0.0155792	0.0176745	0.0153683	0.339307	0.0119435	0.0265901	0.0144664
B044	0.0489501	0.00607141	0.00735154	0.00447154	0.00784675	0.00913142	0.00370438	0.0151807	0.0266097	0.00269178	0.0136675	0.00613654	0.00142042	0.00408584	0.0139416	0.0087109	0.00684551	0.164753	0.00252969	0.00137361	0.00162862	0.0382772	2.975	0.0944537	0.060151	0.0193668	0.0185282	0.0841442	0.00574457	0.000538471	0.00331719	0.0111604	0.00106011	0.00678177	0.0315078	0.00940713	0.00364848	0.000175577	0.0157208	0.0135268	0.000983113	0.00196821	0.0241671	0.065064	0.0789965	0.331111	0.0143294	0.0120434	0.00719676
B045	0.0367591	0.00350383	0.0305602	0.00690607	0.00857986	0.00926629	0.00317307	0.0198203	0.0309067	0.00348023	0.0188135	0.00491149	0.000800908	0.00324727	0.0192535	0.0135768	0.00745097	0.329662	0.00491978	0.000973926	0.00179313	0.0522364	1.23104	0.104031	0.0774331	0.0422092	0.0117855	0.0817744	0.0078802	0.000739622	0.00403547	0.0165585	0.000937901	0.00453451	0.0374812	0.00404534	0.0154292	0.000428783	0.0219462	0.00241438	0.000546718	0.000771131	0.0615501	0.0185136	0.00356401	0.287293	0.00699777	0.0212178	0.0177088
B046	0.0316338	0.00371477	0.0103404	0.00413171	0.00736456	0.00862836	0.00232877	0.0349829	0.0385463	0.00209966	0.0220534	0.00625017	0.000848448	0.00414889	0.0164121	0.00581953	0.00415429	0.129566	0.0019052	0.00842158	0.0022593	0.0458189	3.09773	0.114454	0.0979356	0.0128721	0.0115716	0.077559	0.00369171	0.000692391	0.00276719	0.0119011	0.00104382	0.00602982	0.0214729	0.00669899	0.0120357	0.000286428	0.0259904	0.0112172	0.000835834	0.00120612	0.0264738	0.0377811	0.00654201	0.335306	0.0119109	0.0193655	0.0151174
B047	0.0247724	0.00202927	0.0039269	0.00173831	0.00415762	0.0106381	0.00213443	0.0375236	0.0443337	0.00157107	0.0332364	0.00904977	0.000786254	0.00205542	0.00844504	0.00559561	0.00380336	0.196133	0.000682906	0.000753458	0.00124411	0.0598463	3.09467	0.0632055	0.0991249	0.0351235	0.00995419	0.0535671	0.00670869	0.00065683	0.0169604	0.0153987	0.00120999	0.00501198	0.0190434	0.00812157	0.00904258	0.000260461	0.0236072	0.00665079	0.000717237	0.00077825	0.0230729	0.117931	0.0349213	0.329671	0.0114159	0.0128797	0.0200403
B050	0.0416801	0.00400542	0.0213709	0.00633471	0.00401394	0.00676282	0.00309508	0.0159887	0.025464	0.0026911	0.021374	0.00646166	0.00118818	0.00507106	0.021156	0.00839229	0.004995	0.258697	0.00328485	0.00107148	0.00276656	0.0605095	2.21115	0.0427846	0.086313	0.0973824	0.0147035	0.0971362	0.0152479	0.000504166	0.0214486	0.0217922	0.00138972	0.0109543	0.0360999	0.00588533	0.013309	0.000278085	0.0227118	0.00376678	0.000713943	0.000739572	0.046496	0.0671007	0.0387988	0.240744	0.00989914	0.0272967	0.0117153
B051	0.0301902	0.00548351	0.00586091	0.00250892	0.00382154	0.0107894	0.00177733	0.0471302	0.0444245	0.00190287	0.0219737	0.0105106	0.000843514	0.0037346	0.0117039	0.00621301	0.00382995	0.124395	0.00200844	0.000534099	0.00150277	0.0718984	3.17294	0.0839762	0.0864076	0.0374155	0.0134619	0.07709	0.00685192	0.001076	0.00492102	0.01698	0.00172877	0.00776312	0.0250517	0.0272049	0.0101298	0.000179644	0.0282492	0.0222953	0.00100133	0.0012652	0.029785	0.0774136	0.0811058	0.327843	0.0211036	0.0146311	0.00880357
B053	0.0290401	0.000973534	0.00668055	0.00246563	0.00582047	0.00786307	0.00141843	0.0299926	0.0397254	0.00113496	0.0234888	0.00625773	0.000388137	0.00164337	0.0125494	0.00320789	0.00199103	0.154898	0.000319297	0.00785778	0.00143483	0.0654364	4.14992	0.0740294	0.0916154	0.0213724	0.00624864	0.0752466	0.00562708	8.66963e-05	0.00213978	0.0161706	0.00226073	0.00763794	0.0204171	0.00842937	0.0102952	0.000653285	0.0221773	0.0181946	0.000986488	0.000536486	0.0236163	0.0463423	0.00235697	0.354847	0.0260951	0.0103471	0.0100926
B054	0.0668616	0.00199601	0.0159257	0.00548984	0.00280601	0.00770081	0.00233045	0.0225592	0.0343974	0.00285108	0.0205941	0.00231523	0.00102063	0.0127358	0.0194093	0.0307275	0.00546902	0.189138	0.00233555	0.000419775	0.00127895	0.0479846	1.80528	0.0938464	0.0906207	0.0367166	0.0190787	0.0978247	0.010119	0.00111178	0.00348721	0.0257781	0.00180246	0.0148014	0.038204	0.00443918	0.0183145	0.000433951	0.0290038	0.00163635	0.000451441	0.000678253	0.0484889	0.0153452	0.0198489	0.364903	0.00722487	0.0144973	0.0189394
B055	0.0474491	0.00149608	0.00521748	0.00297031	0.00926243	0.00779283	0.00224705	0.0318557	0.035091	0.00276174	0.0249491	0.00480464	0.000713184	0.00245389	0.0116706	0.00430778	0.00450799	0.208878	0.00147254	0.0081543	0.00190492	0.0529948	3.368	0.136211	0.105472	0.0187588	0.0167547	0.0417477	0.00390871	0.000348978	0.00197815	0.0113656	0.000817291	0.0336576	0.015471	0.0055442	0.0113058	0.000349548	0.01973	0.0134686	0.001647	0.000588654	0.0298768	0.0468834	0.000487557	0.26322	0.0161459	0.0111957	0.00936337
B056	0.0302373	0.00201726	0.0205377	0.00252859	0.00901331	0.00945634	0.00189518	0.0490762	0.0582926	0.0017339	0.0346042	0.00307258	0.000546421	0.00202948	0.0108146	0.00393291	0.00896707	0.222952	0.00351135	0.00281606	0.00163613	0.0966976	1.70805	0.0980976	0.0914097	0.0385698	0.0100172	0.0653025	0.00989465	0.00125034	0.00455533	0.028132	0.00209592	0.0395772	0.0315872	0.00452451	0.0267669	0.00041477	0.0334464	0.0181113	0.00182331	0.00103568	0.0357955	0.0189052	0.0153299	0.366647	0.0151665	0.0270916	0.0133154
B057	0.461685	0.00198371	0.00241469	0.00357457	0.00595257	0.00309404	0.00237936	0.0278223	0.0293275	0.0193257	0.0277048	0.00571916	0.000858927	0.00451167	0.0164706	0.00760992	0.00436496	0.116484	0.0023201	0.000707034	0.00176338	0.0481922	2.96634	0.0285217	0.112893	0.0630972	0.0142081	0.0893078	0.00158551	9.418e-05	0.00931128	0.0334824	0.0125453	0.00558735	0.0363486	0.0202546	0.0142513	0.00299991	0.0116126	0.00758214	0.000546209	0.000940935	0.00727477	0.13136	0.0740826	0.437117	0.0131899	0.0757637	0.00626145
B058	0.0436584	0.0028971	0.0243362	0.00381618	0.0114208	0.00829698	0.00302717	0.0334504	0.0414159	0.00259777	0.024072	0.00244276	0.000892371	0.00371874	0.0134759	0.00598033	0.0108314	0.31719	0.00259134	0.000386641	0.00209298	0.0518227	1.78909	0.0706792	0.0604416	0.0344791	0.012824	0.0750118	0.0114314	0.0011658	0.00432552	0.0202188	0.0012259	0.0352915	0.0290463	0.0044053	0.0162839	0.000282559	0.0310775	0.00683554	0.00129312	0.000591235	0.0411833	0.0206717	0.0134877	0.297328	0.00680147	0.028476	0.0161474
B059	0.0789705	0.00246159	0.0293386	0.00516115	0.00700489	0.00830793	0.00266749	0.0252922	0.0363527	0.00125655	0.0238732	0.00562898	0.000992632	0.00254865	0.0192106	0.0157833	0.00742018	0.164663	0.002383	0.00224886	0.00135289	0.0763534	1.56818	0.0645088	0.0734994	0.0563978	0.0162586	0.0821309	0.0142442	0.00066589	0.00638783	0.0232507	0.000969938	0.0104576	0.042227	0.00622172	0.0188862	0.000576974	0.0289025	0.00828607	0.000641896	0.000827444	0.0531308	0.145178	0.0127141	0.344218	0.0123237	0.0297016	0.0136251
B060	0.0488208	0.00446185	0.0256291	0.00528289	0.00496278	0.0129984	0.00217972	0.0601144	0.0663909	0.00223111	0.0301015	0.00422524	0.0011108	0.00326804	0.0173732	0.00612621	0.00640593	0.0282051	0.0313826	0.000730634	0.00261405	0.0658506	2.85265	0.0700948	0.115914	0.0276271	0.0158283	0.0794851	0.00958691	0.00174499	0.00678466	0.0227832	0.00205473	0.0198721	0.0303391	0.00879185	0.0204309	0.0004105	0.0499482	0.00286348	0.000838257	0.0011633	0.0315461	0.0156668	0.00979218	0.477286	0.0109582	0.0313483	0.0344474
B062	0.0341086	0.00291762	0.0106916	0.0028312	0.00713264	0.0106528	0.00253357	0.0431812	0.0491387	0.00885656	0.0212613	0.0059765	0.000990716	0.00436064	0.0160112	0.0061256	0.00508424	0.0955364	0.00191916	0.0113042	0.00204095	0.0544214	3.59873	0.126054	0.0950574	0.0172989	0.00454109	0.074948	0.00456391	0.00086898	0.00227528	0.0147876	0.00154017	0.00831671	0.0216447	0.00791503	0.0125554	0.000271988	0.0306427	0.0166968	0.000927955	0.000973603	0.0324944	0.0346592	0.0107294	0.348536	0.0272052	0.0213791	0.0126773
B063	0.0416082	0.00544675	0.0148295	0.00501584	0.00528093	0.0112545	0.00347893	0.0470212	0.0607539	0.00229701	0.0267925	0.00369208	0.00238207	0.00438356	0.0126475	0.00860552	0.00453463	0.0792287	0.00755836	0.00119588	0.00146982	0.0320632	3.23446	0.0654734	0.0965312	0.0228385	0.00403898	0.085705	0.00720617	0.00133203	0.00498726	0.022019	0.0018678	0.00778898	0.0331913	0.00943121	0.0209644	0.000410532	0.0275354	0.0037342	0.000463498	0.00104744	0.0286629	0.0191635	0.0207493	0.428281	0.0110789	0.0374694	0.0273363
B064	0.048942	0.00451641	0.00671219	0.00308265	0.00551939	0.011145	0.00271961	0.0401306	0.0466328	0.00175899	0.0289894	0.00570365	0.000910033	0.00395175	0.0108315	0.00778145	0.00525924	0.15454	0.00239655	0.0056324	0.00236004	0.0535954	2.66458	0.0931451	0.0806558	0.0213905	0.012743	0.0510747	0.00355764	0.000985695	0.00337385	0.0128091	0.00122805	0.00986783	0.0168833	0.00762699	0.014129	0.000219472	0.028543	0.0197622	0.000866239	0.000776344	0.0210006	0.0263541	0.0160738	0.328514	0.015078	0.0140078	0.0066222
B065	0.0450299	0.00954668	0.0305129	0.0155271	0.00785135	0.0161037	0.00389115	0.0391917	0.0550792	0.00372483	0.0326823	0.00990702	0.0012952	0.0059349	0.0141351	0.00886625	0.0211192	0.0441462	0.00277574	0.00173312	0.00218852	0.108789	3.95376	0.0786678	0.0891985	0.0793313	0.00969656	0.205736	0.0264146	0.00185531	0.0151112	0.0290362	0.0025428	0.00639588	0.0381883	0.0110613	0.016138	0.000284663	0.026151	0.00896895	0.000960484	0.00123125	0.0295789	0.0154705	0.0221816	0.274033	0.0102748	0.0352179	0.0144067
B066	0.0638416	0.00325593	0.0212566	0.00494021	0.00599382	0.00726459	0.00452242	0.0243936	0.0305748	0.00318247	0.0187196	0.0058509	0.00147715	0.00858773	0.0204558	0.0116752	0.0105043	0.249493	0.00511423	0.00230536	0.00132749	0.0619353	1.75505	0.100488	0.080454	0.0376847	0.0143038	0.0836126	0.0097255	0.000829113	0.00855908	0.0203905	0.00126297	0.0130502	0.0299928	0.00421193	0.0149977	0.000333979	0.0278605	0.00550635	0.000774187	0.00118723	0.0393641	0.0457611	0.014823	0.311885	0.00871816	0.0234235	0.0131544
B068	0.0211915	0.00228923	0.0116971	0.00265326	0.0047062	0.010119	0.00272574	0.0401049	0.0430784	0.00139527	0.0243277	0.0103272	0.000830677	0.00301212	0.0126039	0.00550052	0.00334907	0.16014	0.00100561	0.000379889	0.00172966	0.072101	2.33714	0.0796733	0.0673528	0.0484698	0.00539209	0.0714123	0.00576259	0.00118099	0.00440559	0.0153846	0.00197085	0.00645623	0.0167912	0.00843449	0.00819646	0.000173388	0.0263901	0.0206026	0.000813432	0.00104526	0.032846	0.109389	0.0504467	0.289129	0.0167391	0.0153666	0.00807352
B069	0.0294928	0.00320768	0.0118854	0.00293258	0.00484355	0.0095529	0.00336032	0.0330732	0.0383884	0.00245419	0.0225604	0.00433689	0.00180601	0.00411813	0.0108881	0.00640537	0.0055828	0.27821	0.00400461	0.000998774	0.0023006	0.0762844	1.57229	0.061653	0.0739067	0.102142	0.00538578	0.0744683	0.00871172	0.000761409	0.00292076	0.0160978	0.00131459	0.00365427	0.0326645	0.00492443	0.0150028	0.00022968	0.0180548	0.00337607	0.000444379	0.000934786	0.0437602	0.017918	0.0241981	0.292874	0.00699899	0.0282853	0.0180667
B070	0.0193991	0.00346708	0.0117091	0.00245068	0.00648481	0.0109665	0.00173791	0.0376815	0.0393102	0.00152018	0.0208929	0.00945591	0.000676875	0.0022583	0.010441	0.00753394	0.00341998	0.254262	0.000807269	0.000254878	0.00086065	0.0616832	1.92246	0.0652054	0.0580639	0.0932608	0.00461075	0.0862494	0.00545388	0.000955093	0.00281825	0.0146456	0.00155808	0.00814457	0.0136445	0.0109899	0.00990148	0.000202122	0.0248154	0.0173312	0.000818671	0.000599499	0.0255256	0.0888994	0.063985	0.287639	0.0172462	0.00895961	0.006913
B071	0.0285282	0.00223428	0.0140867	0.00356474	0.00459132	0.00728142	0.0040446	0.0181854	0.0234686	0.00252713	0.0168031	0.00340476	0.00103307	0.0031973	0.0133615	0.00477986	0.00311817	0.819774	0.00289926	0.00213899	0.0012788	0.0708627	1.64402	0.00314869	0.0888023	0.100055	0.00316551	0.0558116	0.00909419	0.000354605	0.00326905	0.013998	0.00116034	0.00969999	0.0223926	0.00200472	0.0154723	0.000322183	0.0201407	0.00309409	0.000575774	0.000895963	0.0450879	0.0180867	0.0142076	0.192226	0.00526733	0.0203594	0.0137037
B073	0.0300701	0.0017725	0.00508257	0.00339321	0.00376649	0.00855308	0.00156726	0.0341436	0.0368824	0.0011721	0.0206298	0.006967	0.000567494	0.00335557	0.00928982	0.00414982	0.00420605	0.240971	0.00175412	0.00560162	0.00102339	0.049723	2.49349	0.0182263	0.0644628	0.0686591	0.0088077	0.039289	0.0050464	0.000723889	0.00284239	0.00939475	0.000890545	0.00503773	0.0166982	0.00848806	0.00968671	0.000228779	0.0211912	0.0172928	0.00065014	0.000563091	0.025143	0.0467101	0.0335712	0.248899	0.0138721	0.0127601	0.00622635
B074	0.0432333	0.00211013	0.00450167	0.0122239	0.00369742	0.00404575	0.00294359	0.00661049	0.00602032	0.0291488	0.0314313	0.00337167	0.00269761	0.00359743	0.0190802	0.00548644	0.00524984	0.307312	0.00224702	0.00046377	0.00266997	0.043049	2.33565	0.00111577	0.0609678	0.0671846	0.00642519	0.0835798	0.0132122	0.000934474	0.00569841	0.0223973	0.0124437	0.014047	0.0372996	0.0444172	0.00484539	0.000228818	0.0145719	0.00822043	0.00100636	0.0128437	0.0302282	0.839571	0.131754	0.389975	0.0158112	0.0739372	0.00917658
B075	0.0503705	0.00339387	0.0301053	0.00499307	0.00737721	0.00902344	0.00241459	0.034235	0.045921	0.00208107	0.0348693	0.00309244	0.000739392	0.00429266	0.0199521	0.00966087	0.00713343	0.151764	0.0175874	0.000674307	0.00249104	0.074105	1.96449	0.11378	0.0967487	0.0262641	0.0428994	0.106459	0.0121635	0.000965077	0.00511614	0.0215627	0.00121822	0.0186252	0.0473797	0.0050206	0.0211566	0.00027137	0.0374122	0.00507289	0.00074139	0.00104667	0.058429	0.0639147	0.0156591	0.4109	0.00985266	0.0152183	0.0225268
B076	0.0389076	0.00198693	0.0163915	0.00479594	0.0116424	0.0097641	0.00332929	0.0168394	0.0241412	0.00388173	0.01758	0.0053163	0.00106382	0.00916265	0.017013	0.0128953	0.00726912	0.226722	0.00348817	0.00328266	0.00422812	0.0484137	2.03404	0.10947	0.0544216	0.02483	0.0069164	0.077792	0.0134374	0.0012207	0.00453859	0.0172462	0.00158761	0.0286289	0.0348022	0.00350274	0.0130567	0.000294204	0.0212902	0.00551105	0.00113083	0.00121102	0.0423562	0.0320553	0.0156928	0.239101	0.00915822	0.0208774	0.0107944
B078	0.0348458	0.00394946	0.00806785	0.00361671	0.00421717	0.0116684	0.00318822	0.0329446	0.0425288	0.00274866	0.0276219	0.00508949	0.000683747	0.00533227	0.0159434	0.00565088	0.00378506	0.0874247	0.00192504	0.0100217	0.00320751	0.0711094	3.43352	0.0942489	0.0936428	0.0154742	0.00695729	0.0677478	0.0059047	0.000681791	0.00286727	0.0225967	0.00232643	0.00509257	0.0207838	0.00588962	0.0112712	0.000186477	0.0305278	0.0215203	0.00107868	0.00125252	0.0305977	0.0397979	0.000842629	0.363226	0.0171276	0.0163461	0.00753369
B079	0.0441106	0.00261728	0.00610102	0.0048798	0.007403	0.0141141	0.00465204	0.0293935	0.0440398	0.00407158	0.0412114	0.00622869	0.00114372	0.00667214	0.0176383	0.0124562	0.00983157	0.0941113	0.00403622	0.00196964	0.00395152	0.0636392	3.16048	0.0317174	0.110005	0.0296532	0.00905925	0.0381882	0.00697941	0.000297214	0.0168693	0.0151481	0.0018128	0.0137749	0.0198177	0.00696124	0.0183452	0.000461712	0.0133649	0.0137985	0.00128364	0.00177282	0.0370118	0.0777125	0.0261695	0.218942	0.0138762	0.0142191	0.00832754
B081	0.0281348	0.00865457	0.00895099	0.00404501	0.00481925	0.0123349	0.00447861	0.043646	0.0536952	0.00279151	0.0293746	0.00702335	0.000886565	0.00377689	0.0184653	0.00883217	0.00547041	0.0390149	0.00191667	0.00884337	0.00267591	0.0569728	4.1361	0.0532267	0.121885	0.0148757	0.00688375	0.106811	0.00534013	0.00134689	0.00399874	0.017199	0.0021906	0.00519545	0.0319269	0.00989575	0.0144655	0.00031706	0.0329739	0.0230591	0.000905662	0.00109357	0.0418502	0.0625259	0.000780088	0.453712	0.0196007	0.0240837	0.0144801
B082	0.0229286	0.00185618	0.00716632	0.00299826	0.00623171	0.0108546	0.00202798	0.0324126	0.0390512	0.00215704	0.0220155	0.00722876	0.00104828	0.00299471	0.0107577	0.00615892	0.00414533	0.159397	0.00124954	0.00283633	0.00307021	0.063514	2.87932	0.0845495	0.0746952	0.0251305	0.0042557	0.0555411	0.00381287	0.000892513	0.00282686	0.0136307	0.00150803	0.00886764	0.0149416	0.0058928	0.0126144	0.000188174	0.0264841	0.0172274	0.00077996	0.000814784	0.0192823	0.154167	0.0335413	0.346786	0.0182028	0.0156545	0.00820775
B083	0.021599	0.00347992	0.0230898	0.00296971	0.0028607	0.012239	0.0014911	0.0626909	0.074813	0.00133816	0.0389002	0.0036001	0.000359051	0.00284753	0.0110939	0.00298558	0.00625198	0.0433942	0.00114817	0.000676068	0.001493	0.0902582	2.56647	0.107557	0.10432	0.0221803	0.00416275	0.0683533	0.00820392	0.000869694	0.0051109	0.0209235	0.00236761	0.0136488	0.0251974	0.00665243	0.0329398	0.000316458	0.0462736	0.0116344	0.000471284	0.000711282	0.0229399	0.0194178	0.0172712	0.504448	0.0150316	0.0362144	0.02894
B093	0.0191403	0.00215782	0.00733675	0.00369927	0.00389564	0.00927017	0.00239147	0.0364032	0.0435211	0.00199701	0.0269254	0.00571318	0.00061059	0.00282803	0.012218	0.0059723	0.00332307	0.0900656	0.00132329	0.00592088	0.00142538	0.0745697	3.79314	0.0834564	0.104616	0.0152781	0.00470614	0.0665682	0.00554171	0.00103381	0.00212924	0.019263	0.00169104	0.00905306	0.0209497	0.00694418	0.0139737	0.000188814	0.0282782	0.0199616	0.000860643	0.00095641	0.0437253	0.0395827	0.027085	0.359525	0.0158451	0.0119885	0.00987168
B096	0.0287286	0.00386618	0.00853957	0.00301649	0.00550701	0.00982627	0.00194276	0.0371547	0.0443605	0.00166287	0.0236409	0.00506007	0.000572463	0.00163985	0.00997394	0.00488995	0.00392267	0.18238	0.00122983	0.00535612	0.00254485	0.0682157	2.96267	0.137125	0.102325	0.0170584	0.00529167	0.0557791	0.00397897	0.000876091	0.00253762	0.0153832	0.00162481	0.00643256	0.014165	0.0145243	0.0101439	0.000233529	0.0291613	0.0152702	0.000713891	0.000861212	0.0133687	0.0253519	0.00932912	0.242737	0.084241	0.00908663	0.00995002
B100	0.301525	0.00488454	0.00495369	0.00370504	0.00828713	0.00682117	0.00557075	0.0123648	0.010357	0.0107876	0.00826867	0.00900461	0.00264389	0.00611193	0.016897	0.0123402	0.00620266	0.128331	0.00244417	0.00139863	0.00286069	0.0127065	1.55347	0.0122763	0.0815494	0.10614	0.016069	0.0924256	0.0157844	9.02974e-05	0.0178478	0.0191193	0.0112908	0.0302563	0.0287647	0.0105527	0.0180869	0.00191357	0.011187	0.00359462	0.000836297	0.00276256	0.017936	0.0793469	0.0924312	0.121007	0.00790356	0.0522582	0.00122492
B103	0.0422127	0.00347124	0.00534515	0.00265218	0.00811281	0.00648163	0.0043446	0.00995343	0.0249716	0.00323354	0.023538	0.00570335	0.0013966	0.00490821	0.0140835	0.00752064	0.00731	0.187559	0.00246752	0.000464268	0.00241426	0.044655	2.45186	0.0312645	0.0577592	0.114454	0.00923173	0.0443498	0.0150997	0.000627464	0.0775347	0.0123448	0.00160257	0.0140929	0.0190648	0.00974463	0.00954306	0.00023438	0.011212	0.00741059	0.00109632	0.0012396	0.0276918	0.0724257	0.0433656	0.184608	0.0092891	0.0082215	0.00563502
B107	0.0558729	0.00422111	0.028726	0.00622387	0.00754545	0.00934037	0.00255581	0.0404245	0.0485693	0.00236127	0.0272866	0.00311894	0.000593917	0.00906895	0.0225626	0.0103003	0.0119302	0.0845691	0.0100548	0.00269598	0.00405829	0.0670325	1.86042	0.0436428	0.0945139	0.03515	0.0123805	0.103597	0.0197341	0.00123832	0.00510356	0.0398592	0.00189344	0.0137616	0.0580149	0.00307787	0.0199697	0.000477571	0.0365043	0.010301	0.00180637	0.00108805	0.0515344	0.0156655	0.00941552	0.424445	0.0132683	0.0257579	0.0177453
C001	0.0735162	0.00491177	0.0204522	0.00434711	0.00581561	0.0105706	0.00452505	0.0521935	0.062465	0.00279514	0.0304281	0.00849641	0.0010185	0.00661277	0.0137958	0.0100738	0.00649036	0.0134984	0.00262739	0.00172823	0.00232572	0.0659056	3.08925	0.0566744	0.0955875	0.0374266	0.0232825	0.0934765	0.0117969	0.00096245	0.00859405	0.0246338	0.00163774	0.0169953	0.0274348	0.00876879	0.0275052	0.00073153	0.0309301	0.0221387	0.00160248	0.00113634	0.0272271	0.0612401	0.0330682	0.424793	0.0184563	0.0192031	0.00903408
C002	0.0497533	0.00507882	0.0254608	0.00591008	0.00580153	0.0112739	0.00316714	0.0508086	0.0657225	0.00380123	0.0365918	0.00310433	0.00122201	0.00525732	0.0186464	0.0116053	0.00633191	0.0224971	0.00986789	0.00107235	0.00269198	0.0810723	2.60597	0.0876367	0.11472	0.0188626	0.0159303	0.0708348	0.00988762	0.00108923	0.0036301	0.0223133	0.00197912	0.0161749	0.0341476	0.00762467	0.0305039	0.000417	0.0411571	0.0169885	0.00101611	0.00128348	0.0372818	0.0181587	0.0385649	0.483067	0.0184764	0.0186233	0.0210985
C003	0.0319484	0.00813336	0.0261969	0.00499151	0.00521529	0.0102116	0.00328525	0.0470094	0.0591375	0.00270715	0.0285445	0.00672528	0.00173587	0.00394031	0.0166852	0.00778892	0.006451	0.0251926	0.0063737	0.000644976	0.00312682	0.0734636	3.2445	0.0669797	0.103163	0.022758	0.00534089	0.0869211	0.0110647	0.00206763	0.00436392	0.0201989	0.00201934	0.00777104	0.0432183	0.0100946	0.0143548	0.000311854	0.0386129	0.0191568	0.000950618	0.00102901	0.0425343	0.03561	0.0257962	0.543099	0.0211539	0.023631	0.0123515
C004	0.0761517	0.00647134	0.0374864	0.00852565	0.00613783	0.00978185	0.00547526	0.0272681	0.0306442	0.0130124	0.0184487	0.00585843	0.0017097	0.00720323	0.0306729	0.0111038	0.0154904	0.101311	0.0213941	0.00373697	0.00596765	0.0642437	1.86142	0.0440561	0.0905646	0.0733758	0.0138792	0.105041	0.0136791	0.000834576	0.00796898	0.0269156	0.00125558	0.00610042	0.0474944	0.0091978	0.021182	0.000530037	0.0323697	0.00683045	0.000789158	0.00164262	0.0727454	0.0708255	0.00851448	0.380369	0.0111365	0.0256044	0.0170709
C005	0.0322714	0.00490436	0.0326355	0.0072861	0.00574509	0.0100183	0.00369541	0.0390597	0.0445362	0.00393634	0.0245983	0.00567493	0.00140561	0.00886994	0.0201367	0.00872871	0.0134839	0.0527817	0.0273829	0.00100587	0.00161666	0.0573617	2.75699	0.0562589	0.0949995	0.0291007	0.00306698	0.120251	0.0116008	0.00154521	0.00568416	0.0237855	0.00210002	0.0187795	0.0509419	0.00607545	0.0134072	0.000646298	0.0379131	0.0145449	0.0012888	0.0013005	0.0809242	0.024829	0.0139917	0.431599	0.0174277	0.0222288	0.0156485
C006	0.0605701	0.00305718	0.0301747	0.00479263	0.00713867	0.0121531	0.00437981	0.0448247	0.0538983	0.0186253	0.0120757	0.00759286	0.00145643	0.00579028	0.0202004	0.00837713	0.0114253	0.0936528	0.00289552	0.00267667	0.0030425	0.0989965	2.11082	0.0636723	0.0773132	0.0597743	0.00877943	0.131282	0.0126053	0.000712818	0.00489926	0.0298083	0.00257966	0.00555735	0.035241	0.0211935	0.0222384	0.000381165	0.0376805	0.0127129	0.000889604	0.00121907	0.0474514	0.179502	0.0360298	0.333861	0.0612106	0.0328222	0.0192287
C007	0.0320876	0.00247905	0.0251288	0.00520522	0.00991142	0.0103165	0.00347487	0.0263375	0.0369446	0.00280522	0.022423	0.00871754	0.00125863	0.00545904	0.0203744	0.00897624	0.00864813	0.090774	0.00261832	0.000793902	0.00255767	0.0827369	2.35411	0.0849958	0.102137	0.0393791	0.00712911	0.092504	0.00918848	0.00124917	0.00498287	0.0236935	0.00133891	0.0147825	0.0300042	0.00347745	0.0130341	0.000378779	0.0301118	0.0138348	0.0012362	0.00097082	0.0588116	0.053226	0.00925957	0.390613	0.0153697	0.0153506	0.0133508
C010	0.0417924	0.00175101	0.00439337	0.00364603	0.00417975	0.00716324	0.0020669	0.0320618	0.0409279	0.00127614	0.0229459	0.00411488	0.000464299	0.00327517	0.0138345	0.00509137	0.00311503	0.126816	0.00125329	0.000774535	0.00213602	0.058008	3.60909	0.077595	0.0931476	0.0154324	0.0101742	0.0492036	0.00492895	0.000586982	0.00267186	0.0160649	0.00157979	0.00989672	0.0209057	0.00616426	0.0110084	0.00042657	0.0251091	0.0219363	0.000856473	0.00105418	0.0327309	0.0326491	0.000635029	0.379374	0.0148852	0.0106301	0.00650094
C011	0.147472	0.00245702	0.0221803	0.00588357	0.0108859	0.0124236	0.00858131	0.0226345	0.0383001	0.018612	0.0117933	0.00488111	0.00196185	0.00671991	0.0262725	0.0142	0.0105566	0.137727	0.00237906	0.00109075	0.00505213	0.075866	2.22109	0.082318	0.0950324	0.0394224	0.00897369	0.0890073	0.0160959	0.000638499	0.0044274	0.032643	0.00127028	0.0547089	0.0457499	0.00980778	0.0138916	0.000459446	0.0222249	0.00324941	0.00212154	0.00160388	0.0712307	0.0268145	0.00948519	0.354005	0.00648096	0.0162303	0.0226435
C014	0.0394328	0.00281684	0.0146083	0.00408404	0.00530233	0.00885496	0.00261645	0.038382	0.0459777	0.00404521	0.0297906	0.00327794	0.00100063	0.00382892	0.0138386	0.00698563	0.00523539	0.163339	0.00269202	0.000355275	0.00379574	0.108379	1.98682	0.0480392	0.0985044	0.02493	0.00740578	0.0456147	0.00895889	0.00101154	0.00437638	0.022778	0.00180531	0.0161581	0.0308062	0.000997846	0.0180565	0.000588386	0.0299697	0.0087012	0.0012548	0.000505587	0.0416573	0.0258728	0.0353377	0.393827	0.0104597	0.0281367	0.0201079
C017	0.0793209	0.00316186	0.014496	0.00371891	0.00525201	0.00915178	0.00367109	0.0450017	0.0496186	0.0021332	0.022395	0.0036548	0.001491	0.00345319	0.0141774	0.00477589	0.00316619	0.0704815	0.00283007	0.000661442	0.0031076	0.0492172	2.792	0.0571414	0.0753896	0.0214372	0.0167069	0.0678944	0.00771029	0.000884319	0.00285748	0.0174337	0.00126891	0.00989879	0.0314815	0.0102244	0.0230906	0.000838643	0.0293808	0.00427707	0.000608696	0.000863518	0.0203274	0.0124217	0.0123444	0.4178	0.00905994	0.0394196	0.0233001
C019	0.0420921	0.00287643	0.0106382	0.00346619	0.0104196	0.0121303	0.00273228	0.0539375	0.0500649	0.00212539	0.0265725	0.0112897	0.00118162	0.0039311	0.0147748	0.0084779	0.00553178	0.0567414	0.00442674	0.00109371	0.00401564	0.0671731	2.65939	0.0732514	0.0945417	0.0135954	0.0109776	0.058397	0.00597616	0.00140817	0.00333837	0.0168948	0.00206869	0.0143943	0.0216955	0.0117336	0.0129102	0.00022287	0.0274073	0.0219039	0.00119506	0.0013332	0.0344516	0.108495	0.00738285	0.248533	0.0691169	0.0207524	0.00702714
C020	0.0281805	0.00202539	0.0126939	0.00287128	0.00576406	0.00968898	0.00155742	0.0465023	0.0529972	0.00254915	0.038969	0.00696479	0.000784289	0.00339107	0.0166001	0.00599499	0.00370816	0.034479	0.00117194	0.000572881	0.00207724	0.0734262	4.75459	0.0758357	0.119574	0.0231405	0.00639686	0.0840261	0.00876114	0.00094783	0.00371631	0.0233072	0.00179902	0.0154377	0.0297257	0.022674	0.0118672	0.000204662	0.0372363	0.0281744	0.00131629	0.000929963	0.0231141	0.110732	0.0276805	0.272592	0.160408	0.0163285	0.00701905
C021	0.0222437	0.00419219	0.0225253	0.0036824	0.00369705	0.0103452	0.00216606	0.0387741	0.0464796	0.00158436	0.025112	0.0067217	0.00126593	0.00343501	0.0156428	0.00611958	0.00396459	0.349725	0.00339567	0.000878556	0.00188318	0.102426	1.91189	0.0489353	0.0880854	0.22675	0.00487541	0.189086	0.00827374	0.000114957	0.00631377	0.0221467	0.00168896	0.00157817	0.0288788	0.00668728	0.0126707	0.000274737	0.0217921	0.00470784	0.000397284	0.000822918	0.0442028	0.0325649	0.0169616	0.273362	0.00769474	0.0270977	0.0208927
C022	0.0595109	0.00481256	0.0290475	0.00492949	0.00609074	0.010671	0.00327234	0.0376899	0.0466799	0.0045913	0.0302628	0.00396429	0.00109677	0.00321363	0.0187809	0.00772028	0.00747449	0.0821434	0.00643048	0.00180853	0.00321588	0.10501	1.96585	0.078359	0.116737	0.0282133	0.00823777	0.0997049	0.0119905	0.000715001	0.0046347	0.0250518	0.00164924	0.0135453	0.0401848	0.00151693	0.0253425	0.00081348	0.0366153	0.00624682	0.000858504	0.000778465	0.0613883	0.0502331	0.0180025	0.409844	0.00995063	0.0383216	0.0252252
C025	0.0521667	0.00295113	0.00876562	0.00359269	0.00619414	0.00897704	0.00279464	0.0343203	0.0352689	0.00273742	0.0205925	0.00831325	0.00121643	0.00443742	0.0179246	0.0134173	0.00449851	0.123144	0.00157634	0.00731483	0.00514198	0.0648075	2.99412	0.0751429	0.0842045	0.0219504	0.0127012	0.0761597	0.00504923	0.00165155	0.00427525	0.0137146	0.0011668	0.00522654	0.0274926	0.00894282	0.010683	0.000193431	0.0222715	0.0174184	0.000830081	0.00129446	0.0352103	0.0447534	0.0219019	0.322906	0.0139774	0.0241664	0.00671198
C026	0.0315921	0.00316142	0.00875365	0.00363799	0.00408162	0.00719643	0.00241556	0.0188568	0.0331513	0.00204215	0.0228897	0.00538736	0.00110857	0.00312329	0.00751889	0.00661285	0.004522	0.240289	0.00253262	0.000514555	0.0012911	0.0415468	2.53515	0.0441351	0.0664719	0.187915	0.00584091	0.0564224	0.0251795	0.000542372	0.0733273	0.0190726	0.000692644	0.00595615	0.0188557	0.00668078	0.0109944	0.00028047	0.0130635	0.00256825	0.000805942	0.000768785	0.0157399	0.00950608	0.0169025	0.256008	0.00699101	0.0103704	0.0104888
C027	0.0540086	0.00294731	0.0217589	0.0061906	0.0076543	0.0134512	0.00404096	0.0518217	0.0550582	0.00297512	0.0325126	0.00746584	0.00115916	0.00405594	0.0172134	0.0071796	0.00464904	0.136968	0.00298	0.00111245	0.00315469	0.0890461	1.72714	0.0792117	0.0709521	0.0939441	0.0110693	0.129772	0.00679466	0.00120522	0.00412875	0.0195978	0.00168652	0.00257558	0.0228284	0.00610828	0.0176567	0.000303598	0.0387702	0.0120643	0.000598437	0.0010908	0.0519517	0.208285	0.0253281	0.388335	0.0175753	0.0219227	0.0195462
C028	0.0374425	0.00202055	0.00877495	0.00289728	0.00396537	0.0100742	0.00196527	0.0381126	0.0470033	0.0015184	0.0262403	0.00596608	0.000435712	0.00234915	0.0113996	0.00510108	0.00356567	0.128101	0.00135748	0.00597798	0.00318575	0.066039	2.95852	0.11707	0.100457	0.0119207	0.00825553	0.0589594	0.00511805	0.00101791	0.00267106	0.0164546	0.00155795	0.00462712	0.0196895	0.00613487	0.0128932	0.00019494	0.0288709	0.0172323	0.000863208	0.000692348	0.0374658	0.0336229	0.00511449	0.380125	0.0167696	0.0152126	0.0135648
C029	0.0241791	0.00324405	0.00573316	0.0027973	0.0109077	0.0082198	0.00159755	0.0181866	0.0260886	0.00201006	0.0189088	0.00527125	0.000687765	0.00269248	0.0132913	0.0048543	0.00346387	0.142606	0.00119891	0.010834	0.00271155	0.0565072	4.06733	0.0862137	0.0772203	0.013679	0.00557568	0.0720685	0.00497155	0.00083548	0.00257214	0.0134569	0.000940414	0.0163834	0.0200768	0.00732473	0.00762724	0.000218972	0.0199363	0.0158536	0.00105987	0.0011064	0.025159	0.0368601	0.0366225	0.378174	0.0180294	0.010712	0.00710203
C030	0.064938	0.00852892	0.0181014	0.00480098	0.00524482	0.0134281	0.00402451	0.0563827	0.0660497	0.00268962	0.0381335	0.00716794	0.0017889	0.00518112	0.0153908	0.00887591	0.0081304	0.0441427	0.00336204	0.00110084	0.0047103	0.0708241	3.21057	0.0692738	0.103726	0.031648	0.0110994	0.0783892	0.00836334	0.0015843	0.00530614	0.0208672	0.00203845	0.0197648	0.0337308	0.0108779	0.0194924	0.000440129	0.0367208	0.0237234	0.00137718	0.00171163	0.0288178	0.0399207	0.0207132	0.42934	0.0216723	0.0372439	0.0117964
C031	0.0389382	0.00389603	0.0115007	0.00281769	0.00495451	0.00896117	0.00232859	0.034838	0.0418475	0.00236236	0.0233071	0.00547578	0.00089055	0.00385912	0.0117432	0.00584633	0.00462609	0.0920313	0.00130373	0.00814322	0.0024531	0.0600422	3.54354	0.0727319	0.106716	0.0150595	0.00662957	0.0583019	0.00586766	0.00128874	0.00239028	0.0152735	0.00214658	0.0106386	0.0253263	0.00507237	0.0153016	0.000303971	0.0283901	0.0215165	0.000880062	0.000683916	0.0406398	0.0386526	0.000652835	0.366067	0.0145596	0.0114972	0.00794142
C032	0.0474744	0.00542617	0.0133213	0.00426013	0.00359134	0.00948075	0.00231331	0.0412376	0.040884	0.00215691	0.0276396	0.00665672	0.00134053	0.00411514	0.0131344	0.00598974	0.00355129	0.419857	0.00279411	0.00175451	0.00283335	0.0817274	1.45979	0.0483865	0.0650312	0.242742	0.00910911	0.170333	0.00598464	9.41644e-05	0.00405997	0.0180385	0.0018114	0.000708359	0.0179054	0.00754481	0.014781	0.000262761	0.0198924	0.0040067	0.000412499	0.000691776	0.0312615	0.0139846	0.0235245	0.20129	0.00539947	0.0333538	0.0206612
C034	0.0712327	0.00433488	0.0130114	0.00547609	0.00567125	0.00812803	0.00545526	0.0346714	0.0489506	0.00428402	0.0326482	0.00374704	0.00134339	0.00473549	0.0186197	0.0104222	0.00594828	0.0683559	0.00382024	0.00101294	0.00321765	0.062696	2.37647	0.0727738	0.107652	0.0265969	0.00911703	0.0887025	0.0113384	0.00134978	0.00359085	0.026805	0.00206222	0.0270371	0.0385777	0.0050669	0.0244877	0.000478015	0.0344562	0.0085732	0.00102538	0.00132008	0.0216121	0.0388812	0.022231	0.472686	0.013463	0.0348462	0.0205496
C036	0.0349064	0.00401643	0.00726344	0.00257127	0.00648707	0.0102254	0.00274869	0.0520987	0.0542349	0.00170419	0.0288753	0.00874756	0.000732647	0.00331195	0.0129068	0.00560604	0.00400733	0.0613173	0.00253665	0.00414342	0.00283286	0.0496924	3.42181	0.06433	0.0904175	0.0137128	0.00820636	0.0510491	0.00461557	0.00126984	0.00366838	0.0165817	0.00221144	0.00928943	0.0195008	0.00891227	0.00900642	0.000285254	0.0280043	0.0236164	0.00141608	0.00084577	0.0322066	0.0313061	0.010776	0.359561	0.0176803	0.0253655	0.011016
C041	0.0367842	0.00243889	0.0132163	0.00451445	0.0054468	0.0106665	0.00251476	0.0472302	0.0563265	0.00186988	0.0276959	0.00686071	0.0005171	0.0024679	0.0166596	0.00658916	0.00411767	0.0250702	0.00115206	0.00887276	0.00229207	0.0755866	3.62082	0.0622176	0.0962121	0.0164069	0.00807262	0.0687582	0.00783582	0.00147345	0.0034783	0.0211548	0.00165461	0.0108546	0.0282686	0.00854888	0.0153997	0.000231912	0.0365704	0.02333	0.00122276	0.000648472	0.0582033	0.136103	0.00961024	0.450371	0.0199975	0.0283362	0.0166385
C042	0.0354842	0.00617254	0.02349	0.00629745	0.00373703	0.0116429	0.00261884	0.0630772	0.0639584	0.00209196	0.0319642	0.0100255	0.00166704	0.0030722	0.0165287	0.00603063	0.0055871	0.113787	0.00477497	0.000640885	0.00424394	0.0714252	2.39855	0.0624884	0.0793003	0.0762284	0.00812472	0.113342	0.00833104	0.00139419	0.00373197	0.0285773	0.00218066	0.00356172	0.0288849	0.0111912	0.0188606	0.000347755	0.0293636	0.00839135	0.000643442	0.000651891	0.0268449	0.01495	0.00633379	0.429883	0.0120269	0.0368012	0.0248993
C044	0.0362023	0.00428143	0.00442299	0.00394267	0.00645816	0.0101826	0.00267875	0.0246491	0.0305287	0.00225859	0.0163466	0.00695825	0.000938711	0.0042579	0.015041	0.00876716	0.0046965	0.160829	0.00211048	0.00120425	0.00211151	0.0490284	3.21874	0.0974761	0.0732118	0.0138287	0.0087603	0.0690642	0.00452625	0.000814604	0.00279546	0.0108824	0.00112476	0.00820489	0.0217191	0.00792797	0.00635756	0.000340996	0.0182021	0.016831	0.00106213	0.00135505	0.0220579	0.0429499	0.0374642	0.343201	0.0125258	0.0151891	0.00738515
C045	0.0489693	0.00309976	0.027808	0.00623252	0.00524562	0.00927166	0.00404109	0.0275623	0.0316718	0.00303341	0.0198835	0.00617946	0.000983037	0.00418013	0.0233285	0.0110515	0.00881929	0.28049	0.00411305	0.00149673	0.00314872	0.0663891	1.32818	0.0793858	0.0835019	0.0353164	0.00917601	0.0810527	0.00739411	0.000603	0.00445698	0.0199121	0.00105373	0.00506957	0.0422406	0.00384079	0.014048	0.000273587	0.0246982	0.0044859	0.000596946	0.00115878	0.0765142	0.0226265	0.00594689	0.326539	0.00760172	0.026067	0.0189069
C046	0.0355319	0.00291794	0.00907844	0.00426671	0.00584681	0.00889636	0.00239079	0.0343726	0.033937	0.00167067	0.0217538	0.00800679	0.000744917	0.00441777	0.0138197	0.00642546	0.00451409	0.115964	0.00182205	0.00670273	0.00343864	0.0582167	2.85562	0.0696291	0.100842	0.0125164	0.00809632	0.069463	0.00374198	0.000895712	0.00305798	0.0112433	0.00137493	0.0073888	0.0216661	0.00565163	0.00876301	0.000181922	0.0273685	0.0161668	0.00102638	0.00107082	0.0307219	0.0409042	0.00355246	0.348045	0.0151509	0.023234	0.0105918
C047	0.0232985	0.00319103	0.00919668	0.0028492	0.00326687	0.00949324	0.00126486	0.0370583	0.0432262	0.00142438	0.0349955	0.00731207	0.000521863	0.00278014	0.0103771	0.00454413	0.00302237	0.197189	0.00135921	0.00051152	0.00106053	0.0667842	2.89662	0.103875	0.0948363	0.0265327	0.00478701	0.0508486	0.00627488	0.000396235	0.0135227	0.0164998	0.00106176	0.00578827	0.0220217	0.00764945	0.0115618	0.000323572	0.0228042	0.010586	0.000647316	0.000568777	0.0260043	0.111738	0.0170376	0.334452	0.0110238	0.0114695	0.0153303
C050	0.0254565	0.00323358	0.0303635	0.00525081	0.00275984	0.00787086	0.00184956	0.0365641	0.0526127	0.00105197	0.0470732	0.0074299	0.000522298	0.00288186	0.0168491	0.00567771	0.00861473	0.0488096	0.0047818	0.000824473	0.00193245	0.085233	2.88387	0.0884083	0.144302	0.0759719	0.00862351	0.102816	0.0157404	0.000566809	0.0352879	0.0315603	0.0010847	0.0144142	0.045189	0.00727871	0.0304494	0.00041514	0.040959	0.00987962	0.000984309	0.000762565	0.0652533	0.153185	0.0228794	0.455115	0.0153791	0.0165573	0.0195785
C051	0.036714	0.00503747	0.0109568	0.00211987	0.00311913	0.00648118	0.00163415	0.0609007	0.0606852	0.00107211	0.0273724	0.0126716	0.000509604	0.00228331	0.0111105	0.00573664	0.00268976	0.0485914	0.000852451	0.000367255	0.00243536	0.0911352	3.57784	0.068814	0.106759	0.0270659	0.00759926	0.106454	0.00730006	0.00128173	0.00560487	0.0193115	0.00176628	0.00472567	0.0318107	0.0360351	0.0166668	0.000231294	0.039917	0.0307935	0.00105195	0.000686462	0.0345923	0.134039	0.0846228	0.466364	0.0259383	0.0206981	0.0110376
C053	0.0226591	0.00191829	0.00355803	0.00321015	0.00521975	0.0103609	0.00357396	0.023142	0.0270446	0.00223759	0.0198776	0.00678949	0.00102316	0.00464279	0.0131091	0.00693555	0.0048196	0.121431	0.000121673	0.00705874	0.000921675	0.0721942	3.49341	0.0799641	0.0924255	0.0193806	0.00324479	0.0657072	0.00545504	0.00100909	0.00338483	0.0154504	0.00128113	0.00924187	0.0179172	0.00590475	0.0121728	0.000354056	0.0215966	0.0146294	0.000931968	0.00105828	0.0270248	0.0942635	0.00254033	0.391189	0.0142617	0.00801666	0.0122513
C054	0.124505	0.00219283	0.0279631	0.00685403	0.00786227	0.00826189	0.00591753	0.0242203	0.0303019	0.00939476	0.00978786	0.0037951	0.0021896	0.0143513	0.0379777	0.0355463	0.0084466	0.067273	0.00559196	0.00145355	0.00447092	0.0549775	1.9498	0.0439704	0.11146	0.0326574	0.0162862	0.106496	0.0110963	0.000790636	0.00507776	0.0416387	0.0021662	0.0131126	0.059379	0.00675351	0.0138066	0.000308784	0.0395221	0.00338311	0.000784607	0.00186241	0.0837756	0.0283305	0.0115314	0.536668	0.0104411	0.0252146	0.0213975
C055	0.0395947	0.00373491	0.00719491	0.00557102	0.0115416	0.00935798	0.00578588	0.0259106	0.0348901	0.00431149	0.022116	0.00609057	0.000917964	0.0070248	0.0139769	0.00949439	0.00928771	0.164406	0.00660133	0.00580006	0.00342169	0.0458158	2.27013	0.108136	0.0834164	0.0119773	0.0262535	0.0337442	0.00284454	0.000385138	0.00186416	0.0107517	0.00132196	0.0130494	0.00984144	0.00450218	0.0239688	0.000548845	0.0235386	0.0157356	0.000962345	0.00151878	0.0317976	0.0347746	0.000650226	0.221341	0.022977	0.00955268	0.00730727
C056	0.0452715	0.0031203	0.0222884	0.00387371	0.00561237	0.0107477	0.00268	0.0484468	0.0535995	0.00264352	0.0288849	0.00399145	0.00115286	0.00323283	0.0169225	0.00747123	0.00952975	0.136892	0.00593384	0.00319403	0.00395355	0.0820431	1.57971	0.0777354	0.0733928	0.0274283	0.00853519	0.0578917	0.00890104	0.00124509	0.00431975	0.0269571	0.00228067	0.00680556	0.0268859	0.00478151	0.0171985	0.000305875	0.0300135	0.00806883	0.00066191	0.00134313	0.0355806	0.0130898	0.0110114	0.355831	0.0100655	0.0294455	0.0224017
C057	0.236878	0.00366334	0.00274556	0.00395994	0.00557824	0.00838327	0.00476544	0.0246063	0.0301315	0.00569397	0.017356	0.00712009	0.00182238	0.00441031	0.021109	0.00803796	0.00720887	0.109359	0.00349093	0.000909234	0.00374707	0.0361332	3.73729	0.0559612	0.087398	0.0395397	0.0126252	0.0956941	0.0142987	0.00135006	0.00604958	0.0320654	0.00299952	0.00981918	0.0387298	0.00687112	0.009495	0.000692789	0.0103734	0.00927343	0.000936061	0.00212949	0.0148186	0.0594596	0.0751979	0.359012	0.0116302	0.0464035	0.00626555
C058	0.0374325	0.00392054	0.0231805	0.00509639	0.0180915	0.0107942	0.0029861	0.0243382	0.0354152	0.00394113	0.0208736	0.00453242	0.00124966	0.00763018	0.018002	0.0134003	0.00994304	0.206362	0.00975994	0.000521383	0.00224787	0.0540743	1.75038	0.0928733	0.0567366	0.02379	0.00413189	0.0508398	0.0117238	0.00119622	0.00576992	0.0246103	0.00178019	0.0420306	0.0325764	0.00407897	0.0131891	0.000514378	0.0275408	0.00574288	0.00167855	0.00171838	0.0387446	0.0286193	0.0126081	0.279715	0.00715458	0.016357	0.0148963
C059	0.0819271	0.00293908	0.0315984	0.00650125	0.00348556	0.00940028	0.00314485	0.0253012	0.0386535	0.00266607	0.0252039	0.00550473	0.00142763	0.0139886	0.0304349	0.0257745	0.00615193	0.0666985	0.00680596	0.00374497	0.00383299	0.0817877	2.05487	0.0574421	0.101775	0.0516786	0.0135662	0.095474	0.0169818	0.00124558	0.0119834	0.0534762	0.00216358	0.00898672	0.0696524	0.00586587	0.0160648	0.000306405	0.0315385	0.00665212	0.000525094	0.00102128	0.0705879	0.199688	0.0128541	0.513577	0.0154349	0.0388806	0.0197725
C060	0.0565352	0.00490995	0.0289126	0.007171	0.00731735	0.0129963	0.00771692	0.0383117	0.0520201	0.0062189	0.0315764	0.00597251	0.00110451	0.00555332	0.0212581	0.0111368	0.0092267	0.0662403	0.00343948	0.00135968	0.00469528	0.0640629	2.68	0.0573324	0.129475	0.0459328	0.0129064	0.0610563	0.00952595	0.00174186	0.0066209	0.0248339	0.00125168	0.0342338	0.0342699	0.008666	0.0234903	0.000399291	0.0365345	0.00536794	0.00167383	0.00120837	0.0362545	0.0163303	0.010094	0.471905	0.0114915	0.0340006	0.026921
C062	0.0467422	0.0040844	0.0113282	0.00497071	0.0074678	0.00938158	0.00497984	0.0358697	0.0376866	0.00369358	0.0197799	0.0078559	0.00158794	0.00463965	0.0181139	0.0105504	0.00860905	0.110146	0.00253166	0.00683483	0.00394441	0.0435124	2.7516	0.0924144	0.0646157	0.0130586	0.0105555	0.0585688	0.00524404	0.00138391	0.00217815	0.0112042	0.00116824	0.00670072	0.0192524	0.00706334	0.0104518	0.000197908	0.0253038	0.0162248	0.00105916	0.00161954	0.0300112	0.0290252	0.00670879	0.302342	0.0150093	0.0195833	0.00743639
C063	0.0319654	0.00583717	0.0125654	0.00449118	0.00573433	0.011369	0.00563566	0.0467881	0.0572283	0.00370928	0.0320494	0.00622143	0.0022608	0.00674233	0.0155678	0.0112979	0.0058892	0.104028	0.0036177	0.00118549	0.00136305	0.0399274	2.43177	0.0707878	0.0921731	0.0219865	0.0040124	0.0637189	0.00680664	0.00118853	0.0041614	0.021161	0.00196646	0.00873381	0.0281394	0.00849024	0.0174591	0.000435279	0.0247281	0.0037415	0.000709378	0.00127126	0.025468	0.0203555	0.0161777	0.399984	0.0101794	0.0375701	0.027138
C064	0.0248901	0.00324122	0.0162607	0.00357568	0.00330664	0.0188067	0.00148469	0.0856202	0.091155	0.0162293	0.0488015	0.0104123	0.00038174	0.00345193	0.00737597	0.00467996	0.0045223	0.0502981	0.000780188	0.000942272	0.00219086	0.118302	2.65954	0.0842077	0.105802	0.0400166	0.00757327	0.0888881	0.0107228	0.00184081	0.00491348	0.0214134	0.00290078	0.00820324	0.0212681	0.0194093	0.0303647	0.00033663	0.0479726	0.0355126	0.000740406	0.00056369	0.0405257	0.0896556	0.0131501	0.413192	0.0318064	0.0226152	0.0152981
C065	0.0312675	0.00621068	0.0230919	0.00436051	0.0057842	0.0141829	0.00261621	0.0525999	0.0674628	0.00300813	0.0325342	0.00705648	0.00162142	0.0049898	0.0183821	0.0081026	0.00653664	0.040714	0.00658436	0.00108965	0.001905	0.0543142	2.84897	0.0555985	0.11995	0.0246416	0.00400542	0.111698	0.00767087	0.00141749	0.00473871	0.0207515	0.00160562	0.003739	0.0319653	0.0109978	0.0280821	0.000354947	0.0364868	0.00288029	0.000517616	0.00162283	0.0326329	0.0137739	0.0130347	0.425412	0.0121241	0.0302323	0.0305089
C066	0.0605619	0.00367583	0.0353393	0.00773584	0.00887352	0.0123675	0.00395875	0.0340827	0.0414747	0.00472918	0.0276355	0.00525462	0.00205057	0.00655794	0.029832	0.0215787	0.0101726	0.0509791	0.00730328	0.00284336	0.00410481	0.0793487	1.94514	0.0830409	0.139753	0.0401853	0.0118804	0.0848773	0.0120505	0.000939507	0.00512117	0.0334896	0.00137831	0.0234247	0.0416399	0.0020186	0.0212292	0.00044804	0.0391083	0.00767917	0.000956004	0.000951588	0.0586021	0.184347	0.0133378	0.521696	0.0155468	0.0201845	0.0223876
C068	0.01918	0.0041469	0.0146268	0.00391873	0.0100263	0.0143003	0.00318817	0.043084	0.046851	0.00290216	0.0228161	0.00947714	0.000776748	0.00366829	0.0150011	0.00957898	0.00536205	0.105549	0.00119266	0.00192587	0.00187317	0.0781185	2.87212	0.0908803	0.0747295	0.0381591	0.00320324	0.074581	0.00666438	0.0013127	0.00564117	0.0193303	0.00149265	0.00839148	0.0206985	0.00976757	0.0101961	0.000446256	0.0287136	0.0182732	0.00105629	0.00131571	0.045185	0.0599085	0.0581553	0.296557	0.0178059	0.0170005	0.0113628
C069	0.0384652	0.00269444	0.0124481	0.00460806	0.00474102	0.00989705	0.0044039	0.0588921	0.0600605	0.00284047	0.0360466	0.00410501	0.00116758	0.00580991	0.0142474	0.00708046	0.00467096	0.174465	0.00378021	0.00127284	0.00113503	0.112544	1.62264	0.0609594	0.0975065	0.108289	0.00334217	0.105664	0.00927498	0.000650562	0.00318573	0.0201729	0.00172724	0.002528	0.0333425	0.00532483	0.0234181	0.000514933	0.0241821	0.00221386	0.000403825	0.000870993	0.0607389	0.0230541	0.0500964	0.391024	0.00797556	0.0305826	0.0312464
C070	0.0291165	0.00608674	0.0183295	0.00492187	0.00870917	0.0130451	0.00530526	0.0490034	0.0534084	0.00246741	0.0262883	0.0097111	0.0011557	0.00612502	0.0187338	0.00856327	0.00559416	0.0591643	0.00375337	0.00104235	0.0017802	0.0822835	3.03772	0.0553843	0.0865419	0.0278696	0.00511859	0.0732492	0.00851335	0.00158129	0.00438483	0.0237235	0.00199774	0.0118069	0.0234899	0.0127164	0.0122868	0.000407579	0.033229	0.0220641	0.00137372	0.00186249	0.0445402	0.0853117	0.0571991	0.390086	0.027635	0.0171533	0.0128365
C071	0.0274685	0.00371459	0.0156374	0.00379282	0.00474574	0.00925234	0.00282007	0.022756	0.0282532	0.00359424	0.0202545	0.00445575	0.000705123	0.00374069	0.0153133	0.00918162	0.00505068	0.537436	0.00306216	0.00209312	0.00156446	0.0645267	1.46081	0.0618777	0.0749287	0.0418619	0.00321898	0.0511135	0.00836444	0.000429366	0.00290105	0.0161736	0.00122941	0.00659536	0.0197663	0.00277305	0.015439	0.000318381	0.0221842	0.00398204	0.00066812	0.00104787	0.047525	0.0161769	0.00338721	0.221261	0.00773247	0.0119989	0.0154585
C073	0.058785	0.00211457	0.00915769	0.00344556	0.00537523	0.0110707	0.00211223	0.0425093	0.0469168	0.001662	0.026948	0.00769263	0.000933721	0.00370957	0.0137685	0.00743921	0.00435211	0.111036	0.00242005	0.00866078	0.00390695	0.0577342	3.31917	0.0812096	0.0799848	0.0287577	0.00886815	0.0595436	0.00498939	0.00108732	0.0035937	0.0127779	0.00125914	0.00523883	0.0220498	0.00870444	0.0102868	0.000219771	0.0248772	0.0224154	0.000985778	0.000989128	0.038071	0.0402817	0.0389184	0.326701	0.0199003	0.0236031	0.00820161
C074	0.0672584	0.00394965	0.00990114	0.00460448	0.0063052	0.0133339	0.00407765	0.0547958	0.0563095	0.00370784	0.026946	0.0063989	0.0024984	0.00436591	0.0162235	0.0119908	0.00582619	0.0931351	0.00249811	0.00196434	0.00198126	0.0604035	2.17455	0.073213	0.0935418	0.0213243	0.00392318	0.0615214	0.00751257	0.00156431	0.00404729	0.0224206	0.00268577	0.00166737	0.0251972	0.00888614	0.0114603	0.000403387	0.0277967	0.00595345	0.000508032	0.00137119	0.019202	0.0274051	0.02448	0.43064	0.0124357	0.0331672	0.0239753
C075	0.0630697	0.00521315	0.0298007	0.00653987	0.00626021	0.010597	0.00455448	0.0346334	0.036193	0.00365589	0.023685	0.00695573	0.0014526	0.00878952	0.0242184	0.0185494	0.0112363	0.143051	0.019446	0.00178393	0.00248313	0.0586884	1.80788	0.0785072	0.0836753	0.0414612	0.00528002	0.0916458	0.0114153	0.000724003	0.00846165	0.0267893	0.00196073	0.0116026	0.0508841	0.00446271	0.012944	0.00032559	0.0309771	0.00229672	0.000322573	0.00118678	0.0556117	0.0462931	0.0102704	0.348282	0.0127339	0.0160873	0.019968
C076	0.025427	0.00235728	0.0131611	0.0030513	0.00558085	0.00680326	0.00355889	0.0169259	0.0204832	0.00249351	0.0148895	0.00493955	0.00101524	0.00484777	0.0108768	0.0127621	0.00649328	0.273275	0.00387368	0.00304898	0.00108213	0.0357836	1.46483	0.0652195	0.0395111	0.114754	0.00282572	0.0350037	0.0139181	0.000190086	0.0289894	0.0154786	0.00105277	0.00522011	0.0209526	0.00430896	0.00887403	0.00034345	0.0131366	0.00299882	0.000395345	0.001139	0.0331847	0.0446958	0.00941714	0.177452	0.00763131	0.0129535	0.00916539
C078	0.0231889	0.00406949	0.00758885	0.00285978	0.00578735	0.0109726	0.00292329	0.0341407	0.0408646	0.00192489	0.0245693	0.00629821	0.000805825	0.00420419	0.0138592	0.00709978	0.00404318	0.108279	0.00207765	0.00981223	0.00163029	0.064269	3.40722	0.0836449	0.081681	0.0150113	0.00282275	0.0578114	0.00560957	0.000825597	0.00291277	0.0185733	0.00152376	0.00391301	0.0195139	0.00730091	0.0121155	0.000240978	0.0290283	0.0210002	0.000849052	0.000829545	0.0268809	0.0360343	0.0099127	0.355939	0.0156286	0.0156056	0.00768551
C079	0.030628	0.00313485	0.00716336	0.00298363	0.00524811	0.00472438	0.00342271	0.00781187	0.0120641	0.0030379	0.010294	0.00180895	0.00201096	0.00378495	0.00749099	0.023017	0.00992478	0.328935	0.00343666	0.0010889	0.000585513	0.0213607	0.850276	0.0014847	0.0358978	0.127185	0.00249775	0.0134228	0.00794207	9.28861e-05	0.0633551	0.0119519	0.00064899	0.00421137	0.0150558	0.00270376	0.00527146	0.0001694	0.00537597	0.00239564	0.000353922	0.000826372	0.0148072	0.0131867	0.0142703	0.0714774	0.00307969	0.00575338	0.00428976
C081	0.0349212	0.00790966	0.0106372	0.00513225	0.00639324	0.0126813	0.00403245	0.0286443	0.0393843	0.00272511	0.0254494	0.00968343	0.00163035	0.00571772	0.0181993	0.00932052	0.00503603	0.0544044	0.00249233	0.00867218	0.00176964	0.0658062	3.6743	0.052659	0.105328	0.0160213	0.00420533	0.0821031	0.00545425	0.00116386	0.00347833	0.0160275	0.0017523	0.00513637	0.0279275	0.00848812	0.0155888	0.000464506	0.0287984	0.0235322	0.000959753	0.00137765	0.0357705	0.0652569	0.00183075	0.381644	0.0225677	0.0207831	0.00874218
C082	0.0232094	0.00461274	0.00885753	0.003941	0.00674202	0.0122057	0.00368074	0.0351927	0.0395084	0.0020761	0.0231713	0.00712296	0.0010165	0.004577	0.0129166	0.0117978	0.00570699	0.111441	0.00297682	0.00359707	0.00194924	0.059339	2.71785	0.0783014	0.0651961	0.0211706	0.00512514	0.0568378	0.00480526	0.00118479	0.00342227	0.0134367	0.00144166	0.00401535	0.019178	0.00809365	0.0160918	0.00023749	0.0273632	0.0188899	0.000937608	0.00145452	0.0228815	0.0969005	0.0350199	0.352323	0.0194371	0.0149196	0.00862109
C083	0.020855	0.00434631	0.0260674	0.00330062	0.0029136	0.0122852	0.00188524	0.0669452	0.0750722	0.00193105	0.0443606	0.00388635	0.000731118	0.00302566	0.0128423	0.00501182	0.00641209	0.0306598	0.00226796	0.000431413	0.00127159	0.098351	2.30044	0.0965226	0.11116	0.0179256	0.00480125	0.0578684	0.00716549	0.0010833	0.00487703	0.0198987	0.00177662	0.0141233	0.0281272	0.00491012	0.0344464	0.000455811	0.0451028	0.0108507	0.000455994	0.00064931	0.0333173	0.0198108	0.0118664	0.503235	0.0138585	0.0292454	0.0311506
C093	0.0241054	0.00402214	0.00991993	0.00379707	0.00889017	0.0127883	0.004566	0.0379242	0.040376	0.00301761	0.026757	0.00724501	0.00148332	0.0062669	0.0191178	0.00861085	0.00493951	0.0758043	0.00366091	0.00652193	0.00170988	0.0857443	3.81798	0.043926	0.0979071	0.0200563	0.00446859	0.0695386	0.00498035	0.0012706	0.00303844	0.0235527	0.00212163	0.00882221	0.0225378	0.00769263	0.0116568	0.000371601	0.029356	0.0205978	0.00102694	0.00116292	0.0451585	0.0681811	0.0344136	0.361273	0.0163321	0.0129951	0.0107674
C096	0.0280584	0.00321135	0.00759997	0.00505358	0.00838751	0.00776529	0.00268583	0.0328217	0.0367266	0.00310852	0.0228294	0.00503488	0.000735544	0.00382237	0.0114295	0.00606517	0.00364589	0.191412	0.00136335	0.00496035	0.00266238	0.063109	2.55141	0.13274	0.0948492	0.0195669	0.00322834	0.0406002	0.00362439	0.000861874	0.00235829	0.0135313	0.00157441	0.0113265	0.0148941	0.0130518	0.00931343	0.000196677	0.0232295	0.0117005	0.000772233	0.00100473	0.013685	0.0308911	0.0140755	0.151556	0.0920516	0.00775287	0.00975567
C100	0.238391	0.00336663	0.00302642	0.00500588	0.00567	0.00527015	0.00427973	0.00661847	0.0112946	0.0247378	0.00553435	0.00731528	0.00163725	0.0037268	0.0188878	0.0114976	0.0077238	0.326055	0.00297717	0.00124709	0.00261526	0.0686258	2.11585	0.0036992	0.0703677	0.0695659	0.00673781	0.0812821	0.0147944	9.7548e-05	0.00176649	0.0186238	0.0130601	0.0128258	0.0265746	0.0264155	0.00741152	0.00198051	0.0154697	0.00560276	0.000715659	0.00652225	0.0216689	0.204636	0.0611679	0.286663	0.0100704	0.0736543	0.00863116
C103	0.0292445	0.00462583	0.00845577	0.00494997	0.00652036	0.00919909	0.00418611	0.0247768	0.0329646	0.00250106	0.0206566	0.0065605	0.00144962	0.00404979	0.0155737	0.0086813	0.00540562	0.152981	0.00217132	0.000757941	0.0012359	0.0647134	2.97333	0.0716017	0.0894272	0.0189148	0.00387918	0.0683827	0.00474027	0.000983945	0.0032948	0.0164634	0.00138424	0.0149538	0.0228514	0.00731186	0.00998053	0.000262096	0.0217591	0.01789	0.00137904	0.00170304	0.0351339	0.0293711	0.0223276	0.322156	0.0204202	0.0157207	0.00881003
C107	0.0654836	0.00571308	0.0336593	0.00733017	0.00673024	0.0119676	0.00420048	0.0311072	0.0409301	0.0169825	0.0101982	0.00631878	0.00137496	0.0110704	0.0316051	0.0160957	0.0105844	0.0769026	0.00504415	0.00330814	0.00362046	0.0810075	2.07711	0.049364	0.114835	0.0635522	0.00774482	0.111507	0.0209254	0.00113359	0.00838771	0.0521563	0.00214824	0.0115926	0.066617	0.0149745	0.018814	0.000364858	0.0343857	0.0112364	0.00089661	0.00146607	0.0804485	0.0184416	0.0361359	0.436905	0.0154459	0.0224532	0.0175815
[truncated: 14 more columns]

## Sheet: abortion
	Formate-8.4415	Hypoxanthine-8.1958	Adenine-8.1866	Xanthine-7.9365	Hippurate-7.8238	Tryptophan-7.7316	Benzoate-7.4743	Phenylalanine-7.3800	Phenylpropionate-7.3198	Tyramine-7.2123	4-Hydroxyphenylacetate-7.1889	4-Hydroxyphenyllactate-6.8472	Fumarate-6.5076	Inosine-6.0888	UDP-5.9707	Uridine-5.8975	Uracil-5.7928	Maltose-5.2280	Ascorbate-4.5071	1,3-Dihydroxyacetone-4.4107	Hydroxyacetone-4.3669	Threonine-4.2471	Lactate-4.1046	Serine-3.9705	Glycine-3.5534	Glucose-3.5209	Methanol-3.3488	Taurine-3.2444	sn-Glycero-3-phosphocholine-3.2158	O-Acetylcholine-3.2060	Choline-3.1912	Ethanolamine-3.1345	Malonate-3.1196	Creatinine-3.0356	Creatine-3.0242	Cadaverine-2.9977	Asparagine-2.8804	TMA-2.8716	Aspartate-2.7846	Sarcosine-2.7442	DMA-2.7072	Methylamine-2.5927	Glutamine-2.4435	Succinate-2.3936	Pyruvate-2.3620	Glutamate-2.3382	4-Aminobutyrate-2.2977	5-Aminopentanoate-2.2332	Methionine-2.1257
A008	0.0311465	0.00419088	0.0212759	0.00711938	0.00759437	0.0157949	0.00407144	0.0432394	0.0596068	0.004479	0.03188	0.00508859	0.00162855	0.00616222	0.0207818	0.0102549	0.00831907	0.083007	0.00594372	0.000936694	0.00220579	0.0560555	3.60302	0.0575643	0.0937055	0.0459311	0.0137829	0.09156	0.0166991	0.00191573	0.00638719	0.0273803	0.00214186	0.0516979	0.0293644	0.0108344	0.0167691	0.00037331	0.0324859	0.0152963	0.00199702	0.00175406	0.0321314	0.0414529	0.0240543	0.358168	0.0161628	0.0269763	0.0141244
A013	0.0504866	0.00455991	0.0302263	0.0203597	0.00538444	0.00792857	0.00307494	0.0149766	0.0231093	0.0118951	0.0180104	0.00691598	0.00279471	0.00636849	0.019705	0.0103813	0.0210793	0.232578	0.00245529	0.00253748	0.00110605	0.0523098	2.13693	0.0352514	0.0771492	0.10576	0.013295	0.0913089	0.00283286	4.55412e-05	0.0250738	0.0332899	0.00447119	0.0271076	0.0586125	0.0187689	0.00825993	0.00891925	0.0219581	0.00730735	0.00128033	0.00349611	0.0434867	0.302058	0.0159481	0.203635	0.0118337	0.0199866	0.0129007
A015	0.0213685	0.00737969	0.00688177	0.00871535	0.0090659	0.00795346	0.00466649	0.0267878	0.0170029	0.024795	0.00823892	0.0205807	0.0073263	0.00753796	0.0157572	0.0109005	0.0127784	0.0381764	0.00926616	0.00623168	0.00291325	0.0252782	0.452812	0.0163948	0.0395386	0.0601258	0.0148809	0.0970194	0.000979672	0.000352487	0.00454938	0.0504539	0.0251571	0.0243101	0.035274	0.0363468	0.0630144	0.0459688	0.022369	0.00529352	0.00151943	0.0171923	0.0239992	0.277376	0.122852	0.0936157	0.007294	0.119771	0.00159202
A023	0.0282537	0.00334412	0.0231526	0.00481111	0.00945072	0.0135202	0.00336164	0.0435422	0.05593	0.00223956	0.0314994	0.00642181	0.00146481	0.0176609	0.0270501	0.0281079	0.00503241	0.0500996	0.00252506	0.00383865	0.00132002	0.0779048	1.91653	0.0903642	0.0964441	0.0385092	0.0133171	0.139592	0.0196647	0.00215389	0.00653241	0.0339829	0.00231805	0.0150977	0.0456082	0.00845218	0.0245486	0.000520554	0.0330052	0.0210389	0.0013109	0.00132276	0.0628664	0.294446	0.0324892	0.430964	0.0217605	0.0202059	0.0139566
A033	0.0312386	0.00464681	0.01128	0.00588767	0.00655664	0.00838649	0.00493544	0.014268	0.0263743	0.003705	0.018986	0.00513704	0.00165642	0.00457345	0.0125672	0.00908682	0.00693949	0.217108	0.00854625	0.0010731	0.00198657	0.0448894	2.90498	0.0226711	0.083607	0.0412003	0.0136364	0.094646	0.0155927	0.000768674	0.00828616	0.0177941	0.00143379	0.0201115	0.0366045	0.00656623	0.012223	0.000268959	0.0212322	0.004208	0.000903122	0.00146778	0.0169153	0.0134382	0.0174802	0.292895	0.0104087	0.0118714	0.00906108
A040	0.0432634	0.00400662	0.0217006	0.00542659	0.00646649	0.0170424	0.00476467	0.0641448	0.0718558	0.00283928	0.035887	0.0121707	0.00259697	0.00828977	0.014385	0.0117156	0.00676208	0.0666448	0.00374954	0.00182316	0.00208414	0.0746687	2.60936	0.0691223	0.0708008	0.0568884	0.019981	0.145401	0.0170246	0.00205887	0.00546792	0.0243638	0.00201313	0.0165362	0.0310089	0.0118009	0.0247455	0.00056431	0.0352236	0.0210933	0.00139636	0.00127029	0.0436477	0.0581223	0.019015	0.386023	0.0248457	0.0277885	0.0139505
A080	0.0391703	0.00307496	0.00608423	0.00517887	0.0101696	0.0103719	0.0063245	0.0224956	0.0275063	0.00412215	0.0164531	0.00833159	0.00136174	0.00781082	0.0153582	0.0129257	0.00790873	0.183433	0.00357386	0.00587945	0.00288013	0.0488606	2.62813	0.0565869	0.0541232	0.0404726	0.0149421	0.058978	0.00556282	0.000485369	0.00278743	0.0168135	0.00188916	0.00496731	0.0132182	0.00527207	0.0112221	0.000300251	0.0173093	0.0104436	0.000857263	0.00169028	0.0340676	0.0408019	0.0225615	0.230334	0.0155777	0.012064	0.00899131
X509	0.08966	0.00382964	0.021401	0.00812862	0.0131657	0.0124672	0.00833093	0.0293789	0.0358994	0.00776664	0.0195494	0.00566327	0.00238974	0.010574	0.0149681	0.021554	0.0183985	0.163357	0.00779675	0.0016322	0.00562102	0.0438657	1.4989	0.0579861	0.0421927	0.0511086	0.0186263	0.078494	0.0187931	0.000612691	0.00485213	0.0203228	0.00184634	0.00387371	0.0290441	0.00493532	0.0182431	0.000420687	0.0224199	0.00586287	0.000745068	0.00155807	0.0369784	0.0150861	0.00826062	0.195086	0.00724201	0.0206567	0.0147684
X512	0.0223074	0.001708	0.0169793	0.00331938	0.00374951	0.00943342	0.00233919	0.0431166	0.0571414	0.00215754	0.0347527	0.00570116	0.000660595	0.00327225	0.00987661	0.00660273	0.00429179	0.109073	0.00208684	0.00100457	0.00161134	0.084877	2.15352	0.116138	0.0933887	0.0257906	0.00608752	0.0808256	0.00906589	0.000879372	0.00363775	0.0204069	0.00160615	0.0130774	0.0230948	0.00490215	0.0188399	0.00035262	0.0398257	0.0193771	0.000785992	0.000515777	0.0315867	0.123964	0.0121614	0.423324	0.0189803	0.019076	0.00997265
X532	0.0329306	0.00269198	0.00635144	0.00339124	0.0112071	0.0107379	0.00483256	0.0321143	0.0435401	0.00290611	0.0331022	0.00485013	0.00162867	0.00511525	0.0155492	0.00818798	0.00710103	0.0998707	0.00551092	0.00658513	0.00169548	0.0691165	2.81033	0.128092	0.0855447	0.0178532	0.00404902	0.0674041	0.00785356	0.000921269	0.00286759	0.0130551	0.000797197	0.0189189	0.0144261	0.00600498	0.0179231	0.000375589	0.026499	0.0206089	0.00103943	0.00164877	0.0359194	0.0431955	0.000585263	0.289705	0.0182101	0.0129262	0.00779481
[truncated: 14 more columns]
